# Supplementary material for: Alveolar soft-part sarcoma (ASPS) resembles a mesenchymal stromal progenitor: evidence from meta-analysis of transcriptomic data
Source: PeerJ. 2020 Jun 19;8:e9394. doi: 10.7717/peerj.9394 (PMC7307565; doi:10.7717/peerj.9394)
Supplement: Supplemental Information 3 [file peerj-08-9394-s003.xlsx]

## Sheet: Sheet1
ID	ASPS-1 Avg (log2)	Gene Symbol	Description
2992814	12.68	GPNMB	glycoprotein (transmembrane) nmb
3452231	11.38	SLC38A1	solute carrier family 38, member 1
3927226	11.35	APP	amyloid beta (A4) precursor protein
2888698	11.31	LMAN2	lectin, mannose-binding 2
2731636	11.31	PARM1	prostate androgen-regulated mucin-like protein 1
3608638	11.28	SV2B	synaptic vesicle glycoprotein 2B
3457160	11.23	CD63	CD63 molecule
3452323	11.22	SLC38A2	solute carrier family 38, member 2
3906942	11.16	SERINC3	serine incorporator 3
3443296	11.07	M6PR	mannose-6-phosphate receptor (cation dependent)
3801411	11.04	NPC1	Niemann-Pick disease, type C1
3607503	10.95	ABHD2	abhydrolase domain containing 2
3921933	10.95	BACE2	beta-site APP-cleaving enzyme 2
3708858	10.87	CD68	CD68 molecule
3356115	10.83	APLP2	amyloid beta (A4) precursor-like protein 2
3837731	10.81	EMP3	epithelial membrane protein 3
3934695	10.72	PTTG1IP	pituitary tumor-transforming 1 interacting protein
2353477	10.71	ATP1A1	ATPase, Na+/K+ transporting, alpha 1 polypeptide
2505386	10.71	MZT2B	mitotic spindle organizing protein 2B
3777470	10.67	PTPRM	protein tyrosine phosphatase, receptor type, M
3301857	10.66	TM9SF3	transmembrane 9 superfamily member 3
3874751	10.6	PRNP	prion protein
3498502	10.59	TM9SF2	transmembrane 9 superfamily member 2
2504328	10.47	GYPC	glycophorin C (Gerbich blood group)
2428501	10.45	SLC16A1	solute carrier family 16 (monocarboxylate transporter), member 1
3634071	10.45	TSPAN3	tetraspanin 3
2409104	10.43	SLC2A1	solute carrier family 2 (facilitated glucose transporter), member 1
2615600	10.43	STT3B	STT3B, subunit of the oligosaccharyltransferase complex (catalytic)
2443335	10.41	SLC19A2	solute carrier family 19 (thiamine transporter), member 2
2934308	10.36	IGF2R	insulin-like growth factor 2 receptor
2649723	10.36	MFSD1	major facilitator superfamily domain containing 1
3388631	10.35	TMEM123	transmembrane protein 123
2940145	10.33	NRN1	neuritin 1
3316344	10.29	CD151	CD151 molecule (Raph blood group)
3402315	10.29	CD9	CD9 molecule
3477917	10.27	SLC15A4	solute carrier family 15 (oligopeptide transporter), member 4
2427007	10.22	SORT1	sortilin 1
2364231	10.21	DDR2	discoidin domain receptor tyrosine kinase 2
3114365	10.18	FAM91A1	family with sequence similarity 91, member A1
3210497	10.16	PRUNE2	prune homolog 2 (Drosophila)
2610317	10.15	BRK1	BRICK1, SCAR/WAVE actin-nucleating complex subunit
2711644	10.12	ATP13A3	ATPase type 13A3
2328273	10.12	SERINC2	serine incorporator 2
2366422	10.11	ATP1B1	ATPase, Na+/K+ transporting, beta 1 polypeptide
3300597	10.1	MYOF	myoferlin
2908423	10.1	SLC29A1	solute carrier family 29 (equilibrative nucleoside transporter), member 1
3802602	10.03	CDH2	cadherin 2, type 1, N-cadherin (neuronal)
3820443	10.03	ICAM1	intercellular adhesion molecule 1
3815014	10	BSG	basigin (Ok blood group)
2477073	9.99	CRIM1	cysteine rich transmembrane BMP regulator 1 (chordin-like)
3333711	9.99	SLC3A2	solute carrier family 3 (amino acid transporter heavy chain), member 2
2710599	9.98	CLDN1	claudin 1
3923426	9.93	AGPAT3	1-acylglycerol-3-phosphate O-acyltransferase 3
3818860	9.93	MCOLN1	mucolipin 1
3060182	9.91	ABCB1	ATP binding cassette subfamily B member 1
4019849	9.91	LAMP2	lysosomal-associated membrane protein 2
3185522	9.85	SLC31A1	solute carrier family 31 (copper transporter), member 1
2822215	9.84	PAM	peptidylglycine alpha-amidating monooxygenase
2622638	9.8	GNAI2	guanine nucleotide binding protein (G protein), alpha inhibiting activity polypeptide 2
2584018	9.78	DPP4	dipeptidyl-peptidase 4
3726154	9.78	ITGA3	integrin alpha 3
3821015	9.77	LDLR	low density lipoprotein receptor
3005266	9.74	VKORC1L1	vitamin K epoxide reductase complex subunit 1 like 1
2779823	9.72	SLC39A8	solute carrier family 39 (zinc transporter), member 8
2634494	9.71	ALCAM	activated leukocyte cell adhesion molecule
3464276	9.66	SLC6A15	solute carrier family 6 (neutral amino acid transporter), member 15
3719980	9.62	LASP1	LIM and SH3 protein 1
3967689	9.62	STS	steroid sulfatase (microsomal), isozyme S
2519294	9.61	FAM171B	family with sequence similarity 171, member B
3066751	9.61	SYPL1	synaptophysin-like 1
3716411	9.56	CPD	carboxypeptidase D
2875193	9.53	P4HA2	prolyl 4-hydroxylase, alpha polypeptide II
3089360	9.49	SLC39A14	solute carrier family 39 (zinc transporter), member 14
3623865	9.49	SPPL2A	signal peptide peptidase like 2A
3400034	9.49	WNK1	WNK lysine deficient protein kinase 1
3020343	9.48	MET	MET proto-oncogene, receptor tyrosine kinase
2990342	9.48	TMEM106B	transmembrane protein 106B
3569754	9.47	ZFP36L1	ZFP36 ring finger protein-like 1
2771342	9.46	EPHA5	EPH receptor A5
2857416	9.46	IL6ST	interleukin 6 signal transducer
2474322	9.43	ATRAID	all-trans retinoic acid-induced differentiation factor
2880932	9.43	CSNK1A1	casein kinase 1, alpha 1
2591837	9.42	SLC40A1	solute carrier family 40 (iron-regulated transporter), member 1
2400518	9.41	ECE1	endothelin converting enzyme 1
3976670	9.39	EBP	emopamil binding protein (sterol isomerase)
2830450	9.38	NPY6R	neuropeptide Y receptor Y6 (pseudogene)
3629103	9.37	KIAA0101	KIAA0101
3237788	9.36	PLXDC2	plexin domain containing 2
3379452	9.35	C11orf24	chromosome 11 open reading frame 24
3095002	9.34	ADAM9	ADAM metallopeptidase domain 9
3394264	9.34	MCAM	melanoma cell adhesion molecule
3862273	9.33	PRR13	proline rich 13
2377229	9.32	CD55	CD55 molecule, decay accelerating factor for complement (Cromer blood group)
2930753	9.31	GINM1	glycoprotein integral membrane 1
3550307	9.3	BDKRB1	bradykinin receptor B1
2967249	9.3	BVES	blood vessel epicardial substance
2774049	9.3	SCARB2	scavenger receptor class B, member 2
3814063	9.29	MBP	myelin basic protein
3502570	9.27	LAMP1	lysosomal-associated membrane protein 1
3061805	9.27	SGCE	sarcoglycan epsilon
3919033	9.27	SLC5A3	solute carrier family 5 (sodium/myo-inositol cotransporter), member 3
2940551	9.26	SSR1	signal sequence receptor, alpha
3023729	9.24	KLHDC10	kelch domain containing 10
2413203	9.24	LRP8	LDL receptor related protein 8
2990404	9.24	SCIN	scinderin
2866590	9.23	LYSMD3	LysM, putative peptidoglycan-binding, domain containing 3
3995804	9.22	SLC6A8	solute carrier family 6 (neurotransmitter transporter), member 8
2363084	9.2	NCSTN	nicastrin
2972310	9.2	SERINC1	serine incorporator 1
3601229	9.19	CD276	CD276 molecule
3543481	9.18	PSEN1	presenilin 1
3902764	9.17	NOL4L	nucleolar protein 4-like
3428671	9.14	CHPT1	choline phosphotransferase 1
2591421	9.14	TFPI	tissue factor pathway inhibitor (lipoprotein-associated coagulation inhibitor)
2391465	9.13	MXRA8	matrix-remodelling associated 8
3448481	9.13	TM7SF3	transmembrane 7 superfamily member 3
3476665	9.12	SCARB1	scavenger receptor class B, member 1
2523213	9.11	BMPR2	bone morphogenetic protein receptor type II
3675116	9.11	TMEM8A	transmembrane protein 8A
3248999	9.1	REEP3	receptor accessory protein 3
2321466	9.09	KAZN	kazrin, periplakin interacting protein
2611848	9.09	SLC6A6	solute carrier family 6 (neurotransmitter transporter), member 6
3326950	9.08	LDLRAD3	low density lipoprotein receptor class A domain containing 3
3108146	9.08	SDC2	syndecan 2
3002640	9.06	EGFR	epidermal growth factor receptor
3488985	9.06	ITM2B	integral membrane protein 2B
2701927	9.06	SLC33A1	solute carrier family 33 (acetyl-CoA transporter), member 1
2869096	9.06	SLCO4C1	solute carrier organic anion transporter family, member 4C1
3792273	9.05	CDH7	cadherin 7, type 2
3953153	9.05	RTN4R	reticulon 4 receptor
3806913	9.04	SMAD2	SMAD family member 2
2692909	9.03	HEG1	heart development protein with EGF-like domains 1
2519229	9.03	ITGAV	integrin alpha V
3896078	9.03	SLC23A2	solute carrier family 23 (ascorbic acid transporter), member 2
2622121	9.02	DAG1	dystroglycan 1 (dystrophin-associated glycoprotein 1)
3820612	9.01	SLC44A2	solute carrier family 44 (choline transporter), member 2
2639129	9	DIRC2	disrupted in renal carcinoma 2
2365958	9	MPZL1	myelin protein zero-like 1
3010503	8.98	CD36	CD36 molecule (thrombospondin receptor)
3706700	8.97	CTNS	cystinosin, lysosomal cystine transporter
2821417	8.96	LNPEP	leucyl/cystinyl aminopeptidase
2431112	8.96	NOTCH2	notch 2
3607510	8.95	FANCI	Fanconi anemia complementation group I
3528864	8.95	MMP14	matrix metallopeptidase 14 (membrane-inserted)
3881686	8.95	TM9SF4	transmembrane 9 superfamily protein member 4
3830359	8.93	CD22	CD22 molecule
3415849	8.93	MFSD5	major facilitator superfamily domain containing 5
3703885	8.93	SLC7A5	solute carrier family 7 (amino acid transporter light chain, L system), member 5
3988538	8.92	IL13RA1	interleukin 13 receptor, alpha 1
3992354	8.92	SLC9A6	solute carrier family 9, subfamily A (NHE6, cation proton antiporter 6), member 6
3916527	8.89	JAM2	junctional adhesion molecule 2
3344990	8.89	PANX1	pannexin 1
2687739	8.88	CD47	CD47 molecule
3284188	8.88	ITGB1	integrin beta 1
3269373	8.88	ZRANB1	zinc finger, RAN-binding domain containing 1
3737338	8.86	RNF213	ring finger protein 213
3873629	8.86	SIRPA	signal-regulatory protein alpha
2853102	8.85	PRLR	prolactin receptor
3442854	8.85	SLC2A3	solute carrier family 2 (facilitated glucose transporter), member 3
2464499	8.84	HNRNPU	heterogeneous nuclear ribonucleoprotein U (scaffold attachment factor A)
2693357	8.83	SLC41A3	solute carrier family 41, member 3
3320944	8.83	TEAD1	TEA domain family member 1 (SV40 transcriptional enhancer factor)
3683377	8.82	GPRC5B	G protein-coupled receptor, class C, group 5, member B
2663551	8.81	NUP210	nucleoporin 210kDa
2572601	8.78	CCDC93	coiled-coil domain containing 93
2778856	8.74	TSPAN5	tetraspanin 5
2520138	8.73	MFSD6	major facilitator superfamily domain containing 6
3542063	8.72	SLC39A9	solute carrier family 39, member 9
3816778	8.71	GNA11	guanine nucleotide binding protein (G protein), alpha 11 (Gq class)
3804195	8.71	SLC39A6	solute carrier family 39 (zinc transporter), member 6
3773241	8.71	TBC1D16	TBC1 domain family, member 16
3848871	8.7	CD320	CD320 molecule
4047493	8.7	PCDH18	protocadherin 18
2648098	8.7	SUCNR1	succinate receptor 1
3181728	8.7	TGFBR1	transforming growth factor, beta receptor 1
2923661	8.69	GJA1	gap junction protein alpha 1
3414561	8.68	DIP2B	disco-interacting protein 2 homolog B
2863363	8.68	F2RL2	coagulation factor II (thrombin) receptor-like 2
3896976	8.67	TMX4	thioredoxin-related transmembrane protein 4
2797393	8.66	FAT1	FAT atypical cadherin 1
3707352	8.66	RNF167	ring finger protein 167
2462511	8.63	HEATR1	HEAT repeat containing 1
2327817	8.63	PTPRU	protein tyrosine phosphatase, receptor type, U
3301556	8.63	TCTN3	tectonic family member 3
3331433	8.63	ZDHHC5	zinc finger, DHHC-type containing 5
3834046	8.62	AXL	AXL receptor tyrosine kinase
2806468	8.62	IL7R	interleukin 7 receptor
2987632	8.62	TTYH3	tweety family member 3
3649890	8.61	ABCC1	ATP binding cassette subfamily C member 1
3546924	8.61	FLRT2	fibronectin leucine rich transmembrane protein 2
3023795	8.6	KLHDC10	kelch domain containing 10
3847989	8.59	CD70	CD70 molecule
2842707	8.59	TSPAN17	tetraspanin 17
2901620	8.58	HLA-E	major histocompatibility complex, class I, E
3065546	8.57	DPY19L2P2	DPY19L2 pseudogene 2
3191273	8.56	GPR107	G protein-coupled receptor 107
3474372	8.56	PXN	paxillin
3189800	8.56	SLC2A8	solute carrier family 2 (facilitated glucose transporter), member 8
3393257	8.55	BACE1	beta-site APP-cleaving enzyme 1
2807359	8.55	OSMR	oncostatin M receptor
2968144	8.55	OSTM1	osteopetrosis associated transmembrane protein 1
4040452	8.53	GCGR	glucagon receptor
2735221	8.53	PKD2	polycystic kidney disease 2 (autosomal dominant)
3073013	8.53	PODXL	podocalyxin-like
3371537	8.51	CHRM4	cholinergic receptor, muscarinic 4
3893086	8.51	SLC17A9	solute carrier family 17 (vesicular nucleotide transporter), member 9
4018729	8.5	IL13RA2	interleukin 13 receptor, alpha 2
3690193	8.49	ITFG1	integrin alpha FG-GAP repeat containing 1
3351385	8.48	KMT2A	lysine (K)-specific methyltransferase 2A
3469180	8.47	SLC41A2	solute carrier family 41 (magnesium transporter), member 2
2446198	8.47	TOR1AIP2	torsin A interacting protein 2
3226097	8.46	ENG	endoglin
3160175	8.45	VLDLR	very low density lipoprotein receptor
2647458	8.44	RNF13	ring finger protein 13
3987446	8.41	ALG13	ALG13, UDP-N-acetylglucosaminyltransferase subunit
3422855	8.41	GLIPR1	GLI pathogenesis-related 1
3897505	8.41	JAG1	jagged 1
3542689	8.41	PCNX	pecanex homolog (Drosophila)
2960955	8.41	SLC17A5	solute carrier family 17 (acidic sugar transporter), member 5
3442205	8.41	ZNF384	zinc finger protein 384
3400625	8.4	ADIPOR2	adiponectin receptor 2
3395464	8.4	CLMP	CXADR-like membrane protein
2768981	8.4	SGCB	sarcoglycan beta
2353717	8.39	PTGFRN	prostaglandin F2 receptor inhibitor
2765865	8.39	RELL1	RELT-like 1
2395146	8.39	TNFRSF9	tumor necrosis factor receptor superfamily, member 9
2807621	8.37	PTGER4	prostaglandin E receptor 4 (subtype EP4)
2671652	8.37	ZDHHC3	zinc finger, DHHC-type containing 3
3353640	8.36	GRAMD1B	GRAM domain containing 1B
2835848	8.36	SLC36A1	solute carrier family 36 (proton/amino acid symporter), member 1
3120443	8.36	SLC52A2	solute carrier family 52 (riboflavin transporter), member 2
3874313	8.35	ATRN	attractin
2636185	8.35	SLC35A5	solute carrier family 35, member A5
2362089	8.32	KIRREL	kin of IRRE like (Drosophila)
3343832	8.32	TYR	tyrosinase
2836451	8.29	MFAP3	microfibrillar associated protein 3
2398736	8.28	ATP13A2	ATPase type 13A2
3013178	8.28	CASD1	CAS1 domain containing 1
2351063	8.28	CSF1	colony stimulating factor 1 (macrophage)
2374926	8.28	SHISA4	shisa family member 4
2562198	8.28	TGOLN2	trans-golgi network protein 2
4015397	8.28	TSPAN6	tetraspanin 6
3401325	8.28	TSPAN9	tetraspanin 9
3081624	8.27	LMBR1	limb development membrane protein 1
3861302	8.26	YIF1B	Yip1 interacting factor homolog B (S. cerevisiae)
3032647	8.25	DPP6	dipeptidyl-peptidase 6
3454576	8.24	SLC11A2	solute carrier family 11 (proton-coupled divalent metal ion transporter), member 2
3824963	8.23	PGPEP1	pyroglutamyl-peptidase I
2683763	8.23	ROBO1	roundabout guidance receptor 1
3362124	8.23	TMEM9B	TMEM9 domain family, member B
3344608	8.22	MTNR1B	melatonin receptor 1B
3704376	8.22	PIEZO1	piezo-type mechanosensitive ion channel component 1
2391532	8.21	CCNL2	cyclin L2
2429842	8.21	CD58	CD58 molecule
3147985	8.21	LRP12	LDL receptor related protein 12
2531589	8.2	ITM2C	integral membrane protein 2C
3735623	8.2	MFSD11	major facilitator superfamily domain containing 11
3985717	8.19	PLP1	proteolipid protein 1
3378244	8.19	SLC29A2	solute carrier family 29 (equilibrative nucleoside transporter), member 2
3350775	8.18	SIDT2	SID1 transmembrane family, member 2
2485636	8.18	SLC1A4	solute carrier family 1 (glutamate/neutral amino acid transporter), member 4
2615360	8.18	TGFBR2	transforming growth factor beta receptor II
2334602	8.18	TSPAN1	tetraspanin 1
3204149	8.17	CNTFR	ciliary neurotrophic factor receptor
3472312	8.16	SLC8B1	solute carrier family 8 (sodium/lithium/calcium exchanger), member B1
3352948	8.16	SORL1	sortilin-related receptor, L(DLR class) A repeats containing
3110272	8.15	FZD6	frizzled class receptor 6
3528895	8.15	LRP10	LDL receptor related protein 10
3996467	8.13	PLXNA3	plexin A3
3701481	8.12	PKD1L2	polycystic kidney disease 1-like 2 (gene/pseudogene)
3748026	8.12	TOM1L2	target of myb1 like 2 membrane trafficking protein
3386638	8.1	SLC36A4	solute carrier family 36 (proton/amino acid symporter), member 4
3812206	8.1	TMX3	thioredoxin-related transmembrane protein 3
3339406	8.09	FOLR1	folate receptor 1 (adult)
4027370	8.09	SLC10A3	solute carrier family 10, member 3
3408831	8.09	SSPN	sarcospan
2515627	8.05	ITGA6	integrin alpha 6
2854092	8.05	LIFR	leukemia inhibitory factor receptor alpha
3850406	8.04	S1PR5	sphingosine-1-phosphate receptor 5
3418492	8.04	TSPAN31	tetraspanin 31
3835645	8.03	PVR	poliovirus receptor
3041519	8.03	TRA2A	transformer 2 alpha homolog (Drosophila)
2651782	8.02	SEC62	SEC62 homolog, preprotein translocation factor
3671202	8.01	CDH13	cadherin 13
2386747	8.01	GPR137B	G protein-coupled receptor 137B
2323603	8.01	PQLC2	PQ loop repeat containing 2
2602770	8	DNER	delta/notch like EGF repeat containing
2749191	8	GLRB	glycine receptor beta
2696252	8	RYK	receptor-like tyrosine kinase
3218528	7.99	ABCA1	ATP binding cassette subfamily A member 1
3518766	7.99	EDNRB	endothelin receptor type B
3402444	7.99	LTBR	lymphotoxin beta receptor (TNFR superfamily, member 3)
3092808	7.99	NRG1	neuregulin 1
2494537	7.98	ARID5A	AT rich interactive domain 5A (MRF1-like)
2783473	7.98	C4orf3	chromosome 4 open reading frame 3
3076076	7.98	SLC37A3	solute carrier family 37, member 3
3724545	7.97	ITGB3	integrin beta 3
3471769	7.97	TMEM116	transmembrane protein 116
2565484	7.96	LMAN2L	lectin, mannose-binding 2-like
2827525	7.96	SLC12A2	solute carrier family 12 (sodium/potassium/chloride transporter), member 2
3620515	7.95	TMEM87A	transmembrane protein 87A
3256074	7.94	BMPR1A	bone morphogenetic protein receptor type IA
3204496	7.94	PIGO	phosphatidylinositol glycan anchor biosynthesis class O
3318173	7.91	OR51E1	olfactory receptor, family 51, subfamily E, member 1
3639406	7.9	FAM174B	family with sequence similarity 174, member B
2821761	7.9	RGMB	repulsive guidance molecule family member b
2645764	7.89	ATP1B3	ATPase, Na+/K+ transporting, beta 3 polypeptide
2487082	7.88	ANTXR1	anthrax toxin receptor 1
2494709	7.88	CNNM4	cyclin and CBS domain divalent metal cation transport mediator 4
3898355	7.87	FLRT3	fibronectin leucine rich transmembrane protein 3
3308241	7.86	GFRA1	GDNF family receptor alpha 1
3059226	7.86	PCLO	piccolo presynaptic cytomatrix protein
2829562	7.86	TXNDC15	thioredoxin domain containing 15
2730746	7.85	SLC4A4	solute carrier family 4 (sodium bicarbonate cotransporter), member 4
2693937	7.85	TPRA1	transmembrane protein, adipocyte asscociated 1
2379280	7.84	FLVCR1	feline leukemia virus subgroup C cellular receptor 1
3820458	7.84	ICAM4	intercellular adhesion molecule 4 (Landsteiner-Wiener blood group)
2434139	7.84	SV2A	synaptic vesicle glycoprotein 2A
2320727	7.84	TNFRSF1B	tumor necrosis factor receptor superfamily, member 1B
3197014	7.82	GLIS3	GLIS family zinc finger 3
3986261	7.82	RNF128	ring finger protein 128, E3 ubiquitin protein ligase
3727449	7.82	TOM1L1	target of myb1 like 1 membrane trafficking protein
3227696	7.81	RAPGEF1	Rap guanine nucleotide exchange factor 1
2828115	7.8	LYRM7	LYR motif containing 7
3126368	7.8	PSD3	pleckstrin and Sec7 domain containing 3
3082874	7.79	ARHGEF10	Rho guanine nucleotide exchange factor 10
3892452	7.79	LSM14B	LSM family member 14B
3240452	7.78	BAMBI	BMP and activin membrane-bound inhibitor
2816459	7.78	F2R	coagulation factor II (thrombin) receptor
3639479	7.78	FAM174B	family with sequence similarity 174, member B
2635641	7.78	PVRL3	poliovirus receptor-related 3
2369950	7.78	QSOX1	quiescin Q6 sulfhydryl oxidase 1
3071636	7.78	RBM28	RNA binding motif protein 28
3734479	7.78	TMEM104	transmembrane protein 104
3768969	7.77	ABCA5	ATP binding cassette subfamily A member 5
3711869	7.77	ADORA2B	adenosine A2b receptor
3360486	7.77	OR51B4	olfactory receptor, family 51, subfamily B, member 4
3441849	7.77	TNFRSF1A	tumor necrosis factor receptor superfamily, member 1A
2647015	7.76	AGTR1	angiotensin II receptor, type 1
3683430	7.76	GPR139	G protein-coupled receptor 139
3405587	7.76	GPRC5A	G protein-coupled receptor, class C, group 5, member A
3774883	7.74	CD7	CD7 molecule
3918535	7.74	IL10RB	interleukin 10 receptor, beta
3456732	7.73	ITGA5	integrin alpha 5
2845699	7.73	SLC12A7	solute carrier family 12 (potassium/chloride transporter), member 7
3333116	7.72	DAGLA	diacylglycerol lipase, alpha
3394092	7.72	SLC37A4	solute carrier family 37 (glucose-6-phosphate transporter), member 4
2955673	7.71	ENPP5	ectonucleotide pyrophosphatase/phosphodiesterase 5 (putative)
2582562	7.7	ACVR1	activin A receptor type I
2774971	7.7	ANTXR2	anthrax toxin receptor 2
3444820	7.7	LRP6	LDL receptor related protein 6
2640579	7.7	PLXNA1	plexin A1
3833122	7.69	DLL3	delta-like 3 (Drosophila)
3405748	7.69	EMP1	epithelial membrane protein 1
3866276	7.68	SLC1A5	solute carrier family 1 (neutral amino acid transporter), member 5
3922664	7.68	SLC37A1	solute carrier family 37 (glucose-6-phosphate transporter), member 1
2842157	7.67	HRH2	histamine receptor H2
3336576	7.66	LRFN4	leucine rich repeat and fibronectin type III domain containing 4
3846238	7.66	MFSD12	major facilitator superfamily domain containing 12
2700365	7.66	TM4SF1	transmembrane 4 L six family member 1
3332626	7.66	TMEM132A	transmembrane protein 132A
2453370	7.65	PLXNA2	plexin A2
3323748	7.64	ANO5	anoctamin 5
3352618	7.64	GRIK4	glutamate receptor, ionotropic, kainate 4
3918574	7.64	IFNAR1	interferon (alpha, beta and omega) receptor 1
3421244	7.64	SLC35E3	solute carrier family 35, member E3
2693569	7.64	ZXDC	ZXD family zinc finger C
3456260	7.62	ATF7	activating transcription factor 7
2629345	7.62	GPR27	G protein-coupled receptor 27
3067478	7.62	NRCAM	neuronal cell adhesion molecule
3650762	7.62	TMC7	transmembrane channel like 7
3855910	7.61	ATP13A1	ATPase type 13A1
2534354	7.61	LRRFIP1	leucine rich repeat (in FLII) interacting protein 1
2581726	7.61	RPRM	reprimo, TP53 dependent G2 arrest mediator candidate
2454378	7.61	SLC30A1	solute carrier family 30 (zinc transporter), member 1
3850261	7.6	ICAM3	intercellular adhesion molecule 3
3892812	7.59	SLCO4A1	solute carrier organic anion transporter family, member 4A1
3708597	7.59	SPEM1	spermatid maturation 1
2353237	7.58	VANGL1	VANGL planar cell polarity protein 1
3742285	7.57	CXCL16	chemokine (C-X-C motif) ligand 16
3830051	7.57	SCN1B	sodium channel, voltage gated, type I beta subunit
3655806	7.57	TMEM219	transmembrane protein 219
3311832	7.56	ADAM12	ADAM metallopeptidase domain 12
2785035	7.56	MFSD8	major facilitator superfamily domain containing 8
2439101	7.55	FCRL1	Fc receptor-like 1
3191338	7.55	GPR107	G protein-coupled receptor 107
2671787	7.55	TMEM158	transmembrane protein 158 (gene/pseudogene)
2736060	7.54	GRID2	glutamate receptor, ionotropic, delta 2
3275690	7.54	IL15RA	interleukin 15 receptor, alpha
2987199	7.54	MAFK	v-maf avian musculoaponeurotic fibrosarcoma oncogene homolog K
2881239	7.54	PDGFRB	platelet-derived growth factor receptor, beta polypeptide
3254521	7.53	TSPAN14	tetraspanin 14
3183111	7.51	SLC44A1	solute carrier family 44 (choline transporter), member 1
2654815	7.5	ATP11B	ATPase, class VI, type 11B
3212420	7.5	SLC28A3	solute carrier family 28 (concentrative nucleoside transporter), member 3
3186966	7.5	TLR4	toll-like receptor 4
4006841	7.49	SLC9A7	solute carrier family 9, subfamily A (NHE7, cation proton antiporter 7), member 7
2539821	7.46	ADAM17	ADAM metallopeptidase domain 17
2761321	7.46	BOD1L1	biorientation of chromosomes in cell division 1-like 1
2437273	7.46	FAM189B	family with sequence similarity 189, member B
3741502	7.46	SHPK; TRPV1	sedoheptulokinase; transient receptor potential cation channel, subfamily V, member 1
2333168	7.46	SZT2	seizure threshold 2 homolog (mouse)
3453252	7.45	ADCY6	adenylate cyclase 6
3340269	7.45	POLD3	polymerase (DNA-directed), delta 3, accessory subunit
3830961	7.44	APLP1	amyloid beta (A4) precursor-like protein 1
2494749	7.44	CNNM3	cyclin and CBS domain divalent metal cation transport mediator 3
3587015	7.44	KLF13	Kruppel-like factor 13
3678516	7.44	NAGPA	N-acetylglucosamine-1-phosphodiester alpha-N-acetylglucosaminidase
3331262	7.44	RTN4RL2	reticulon 4 receptor-like 2
2452691	7.44	SLC41A1	solute carrier family 41 (magnesium transporter), member 1
3012213	7.43	FZD1	frizzled class receptor 1
2333318	7.42	PTPRF	protein tyrosine phosphatase, receptor type, F
2450668	7.42	TMEM9	transmembrane protein 9
2694817	7.41	PLXND1	plexin D1
2395890	7.4	CLSTN1	calsyntenin 1
3740770	7.4	RTN4RL1	reticulon 4 receptor-like 1
3855506	7.4	TMEM161A	transmembrane protein 161A
3394315	7.39	C1QTNF5; MFRP	C1q and tumor necrosis factor related protein 5; membrane frizzled-related protein
3694657	7.38	CDH11	cadherin 11, type 2, OB-cadherin (osteoblast)
2878074	7.38	NRG2	neuregulin 2
3507710	7.38	SLC7A1	solute carrier family 7 (cationic amino acid transporter, y+ system), member 1
3082590	7.37	FBXO25	F-box protein 25
3261971	7.36	CNNM2	cyclin and CBS domain divalent metal cation transport mediator 2
3364095	7.36	CYP2R1	cytochrome P450, family 2, subfamily R, polypeptide 1
3090006	7.36	SLC25A37	solute carrier family 25 (mitochondrial iron transporter), member 37
3958005	7.35	PRR14L	proline rich 14-like
2835300	7.35	SLC26A2	solute carrier family 26 (anion exchanger), member 2
3328520	7.34	CD82	CD82 molecule
2986350	7.34	DLL1	delta-like 1 (Drosophila)
3835814	7.34	PVRL2	poliovirus receptor-related 2 (herpesvirus entry mediator B)
2549565	7.34	SLC8A1	solute carrier family 8 (sodium/calcium exchanger), member 1
3056292	7.33	CLDN3	claudin 3
2449693	7.33	DENND1B	DENN/MADD domain containing 1B
2965653	7.33	GPR63	G protein-coupled receptor 63
2523540	7.33	NBEAL1	neurobeachin like 1
3598267	7.33	SLC51B	solute carrier family 51, beta subunit
3645816	7.33	ZNF75A	zinc finger protein 75a
2518272	7.32	ITGA4	integrin alpha 4
2769810	7.32	KDR	kinase insert domain receptor
2832459	7.32	PCDHB14	protocadherin beta 14
3617312	7.32	SLC12A6	solute carrier family 12 (potassium/chloride transporter), member 6
3732092	7.31	CACNG4	calcium channel, voltage-dependent, gamma subunit 4
2850964	7.31	CDH12	cadherin 12, type 2 (N-cadherin 2)
3608398	7.31	FURIN	furin (paired basic amino acid cleaving enzyme)
3334277	7.31	NUDT22	nudix hydrolase 22
2500615	7.3	TMEM87B	transmembrane protein 87B
3504691	7.3	ZDHHC20	zinc finger, DHHC-type containing 20
2925953	7.29	ENPP1	ectonucleotide pyrophosphatase/phosphodiesterase 1
2922715	7.29	FAM26E	family with sequence similarity 26, member E
2610707	7.29	HRH1	histamine receptor H1
3610804	7.29	IGF1R	insulin-like growth factor 1 receptor
2960010	7.29	LMBRD1	LMBR1 domain containing 1
3304853	7.29	SH3PXD2A	SH3 and PX domains 2A
3901041	7.29	THBD	thrombomodulin
3913525	7.28	DIDO1	death inducer-obliterator 1
2939892	7.28	LYRM4	LYR motif containing 4
2657831	7.27	IL1RAP	interleukin 1 receptor accessory protein
3220846	7.27	SUSD1	sushi domain containing 1
3521174	7.26	ABCC4	ATP binding cassette subfamily C member 4
3720402	7.26	ERBB2	erb-b2 receptor tyrosine kinase 2
2423907	7.26	F3	coagulation factor III (thromboplastin, tissue factor)
3666146	7.25	SLC7A6	solute carrier family 7 (amino acid transporter light chain, y+L system), member 6
3372097	7.24	ACP2	acid phosphatase 2, lysosomal
3088486	7.24	LPL	lipoprotein lipase
2805635	7.24	NPR3	natriuretic peptide receptor 3
3015865	7.24	SLC12A9	solute carrier family 12, member 9
2327045	7.23	GPR3	G protein-coupled receptor 3
3918635	7.23	IFNGR2	interferon gamma receptor 2 (interferon gamma transducer 1)
3265565	7.22	ATRNL1	attractin-like 1
3853108	7.22	NOTCH3	notch 3
2673547	7.22	SLC26A6	solute carrier family 26 (anion exchanger), member 6
3591281	7.22	TMEM62	transmembrane protein 62
3573994	7.19	CEP128	centrosomal protein 128kDa
3623683	7.19	GABPB1	GA binding protein transcription factor, beta subunit 1
2383312	7.19	PSEN2	presenilin 2
3379269	7.19	UNC93B1	unc-93 homolog B1 (C. elegans)
2375596	7.18	ADORA1	adenosine A1 receptor
2672712	7.18	SCAP	SREBF chaperone
3557350	7.18	SLC22A17	solute carrier family 22, member 17
2360576	7.17	ADAM15	ADAM metallopeptidase domain 15
2367537	7.17	SUCO	SUN domain containing ossification factor
3619116	7.16	GPR176	G protein-coupled receptor 176
2922972	7.14	DCBLD1	discoidin, CUB and LCCL domain containing 1
3841076	7.14	MYADM	myeloid-associated differentiation marker
3816424	7.14	SPPL2B	signal peptide peptidase like 2B
3846280	7.14	TBXA2R	thromboxane A2 receptor
2592598	7.14	TMEFF2	transmembrane protein with EGF-like and two follistatin-like domains 2
3475879	7.13	ABCB9	ATP binding cassette subfamily B member 9
3064574	7.13	CLDN15	claudin 15
2878273	7.13	HBEGF	heparin-binding EGF-like growth factor
3864680	7.13	LYPD5	LY6/PLAUR domain containing 5
3223551	7.13	MEGF9	multiple EGF-like-domains 9
3608787	7.13	SLCO3A1	solute carrier organic anion transporter family, member 3A1
2391150	7.12	TNFRSF18	tumor necrosis factor receptor superfamily, member 18
3230610	7.11	ABCA2	ATP binding cassette subfamily A member 2
2360257	7.11	IL6R	interleukin 6 receptor
2562387	7.11	TMEM150A	transmembrane protein 150A
2666904	7.1	SLC4A7	solute carrier family 4, sodium bicarbonate cotransporter, member 7
2532294	7.09	ALPPL2	alkaline phosphatase, placental like 2
2397948	7.09	EPHA2	EPH receptor A2
3895535	7.09	GFRA4	GDNF family receptor alpha 4
2820884	7.09	GPR150	G protein-coupled receptor 150
2973376	7.09	PTPRK	protein tyrosine phosphatase, receptor type, K
2439975	7.08	IGSF8	immunoglobulin superfamily, member 8
3146012	7.08	NIPAL2	NIPA-like domain containing 2
2856044	7.07	EMB	embigin
2596776	7.07	FZD5	frizzled class receptor 5
2692816	7.07	ITGB5	integrin beta 5
2716328	7.05	ADRA2C	adrenoceptor alpha 2C
3168309	7.05	RECK	reversion-inducing-cysteine-rich protein with kazal motifs
2915828	7.04	NT5E	5-nucleotidase, ecto (CD73)
3675840	7.04	UNKL	unkempt family zinc finger-like
3496637	7.03	GPC6	glypican 6
3892067	7.02	CDH4	cadherin 4, type 1, R-cadherin (retinal)
2838462	7.02	GABRG2	gamma-aminobutyric acid (GABA) A receptor, gamma 2
2375038	7.02	GPR37L1	G protein-coupled receptor 37 like 1
2805695	7.02	NPR3	natriuretic peptide receptor 3
3158581	7.02	SLC39A4	solute carrier family 39 (zinc transporter), member 4
3157147	7.01	LYNX1	Ly6/neurotoxin 1
2470805	7.01	MYCN	v-myc avian myelocytomatosis viral oncogene neuroblastoma derived homolog
2318170	7.01	RNF207	ring finger protein 207
2353337	7.01	SLC22A15	solute carrier family 22, member 15
3657041	7	ITGAX	integrin alpha X
3077168	7	KEL	Kell blood group, metallo-endopeptidase
2593407	7	PGAP1	post-GPI attachment to proteins 1
3964049	6.99	CELSR1	cadherin, EGF LAG seven-pass G-type receptor 1
2352501	6.98	LRIG2	leucine-rich repeats and immunoglobulin-like domains 2
3950602	6.98	PANX2	pannexin 2
3721989	6.97	CNTNAP1	contactin associated protein 1
3834778	6.96	MEGF8	multiple EGF-like-domains 8
3726691	6.95	ABCC3	ATP binding cassette subfamily C member 3
3679959	6.95	EMP2	epithelial membrane protein 2
3348568	6.95	LAYN	layilin
3442137	6.95	LPAR5	lysophosphatidic acid receptor 5
2680591	6.95	LRIG1	leucine-rich repeats and immunoglobulin-like domains 1
3903598	6.93	GGT7	gamma-glutamyltransferase 7
3962401	6.93	NFAM1	NFAT activating protein with ITAM motif 1
3434726	6.93	P2RX7	purinergic receptor P2X, ligand gated ion channel, 7
3168210	6.93	TMEM8B	transmembrane protein 8B
3554282	6.92	INF2	inverted formin, FH2 and WH2 domain containing
3526378	6.92	PCID2	PCI domain containing 2
2626802	6.92	PTPRG	protein tyrosine phosphatase, receptor type, G
2915133	6.92	TPBG	trophoblast glycoprotein
2714465	6.91	FGFRL1	fibroblast growth factor receptor-like 1
2608309	6.91	LRRN1	leucine rich repeat neuronal 1
2339872	6.91	ROR1	receptor tyrosine kinase-like orphan receptor 1
3373893	6.9	SLC43A1	solute carrier family 43 (amino acid system L transporter), member 1
3260018	6.9	ZFYVE27	zinc finger, FYVE domain containing 27
2622359	6.88	RBM6	RNA binding motif protein 6
3401381	6.88	TSPAN9	tetraspanin 9
2909020	6.87	ENPP4	ectonucleotide pyrophosphatase/phosphodiesterase 4 (putative)
2383915	6.87	GJC2	gap junction protein gamma 2
3156640	6.87	GPR20	G protein-coupled receptor 20
2832447	6.87	PCDHB13	protocadherin beta 13
2545549	6.87	SLC5A6	solute carrier family 5 (sodium/multivitamin and iodide cotransporter), member 6
3316375	6.87	TSPAN4	tetraspanin 4
2392095	6.86	FAAP20	Fanconi anemia core complex associated protein 20
3876084	6.86	LAMP5	lysosomal-associated membrane protein family, member 5
2777564	6.85	FAM13A	family with sequence similarity 13, member A
3960605	6.85	KCNJ4	potassium channel, inwardly rectifying subfamily J, member 4
2374414	6.84	GPR25	G protein-coupled receptor 25
2532399	6.83	CHRNG	cholinergic receptor, nicotinic gamma
2847967	6.83	SEMA5A	sema domain, seven thrombospondin repeats (type 1 and type 1-like), transmembrane domain (TM) and short cytoplasmic domain, (semaphorin) 5A
2350596	6.82	CELSR2	cadherin, EGF LAG seven-pass G-type receptor 2
3316057	6.82	DRD4	dopamine receptor D4
3752258	6.82	EVI2B	ecotropic viral integration site 2B
3838556	6.82	FLT3LG	fms-related tyrosine kinase 3 ligand
3375091	6.82	SLC15A3	solute carrier family 15 (oligopeptide transporter), member 3
3874636	6.82	SMOX	spermine oxidase
3730322	6.81	MRC2	mannose receptor, C type 2
3760552	6.81	RPRML	reprimo-like
3836401	6.8	GIPR	gastric inhibitory polypeptide receptor
2986999	6.8	GPR146	G protein-coupled receptor 146
2661992	6.8	OXTR	oxytocin receptor
2821981	6.79	FAM174A	family with sequence similarity 174, member A
2523045	6.79	FZD7	frizzled class receptor 7
2756514	6.79	MFSD7	major facilitator superfamily domain containing 7
3935016	6.79	SLC19A1	solute carrier family 19 (folate transporter), member 1
2834743	6.78	ADRB2	adrenoceptor beta 2, surface
2913694	6.78	CD109	CD109 molecule
2676579	6.78	RFT1	RFT1 homolog
2857301	6.78	SLC38A9	solute carrier family 38, member 9
3326635	6.77	CD44	CD44 molecule (Indian blood group)
3363266	6.77	DKK3	dickkopf WNT signaling pathway inhibitor 3
2391172	6.77	TNFRSF4	tumor necrosis factor receptor superfamily, member 4
2899372	6.76	BTN3A1	butyrophilin, subfamily 3, member A1
3367096	6.76	LGR4	leucine-rich repeat containing G protein-coupled receptor 4
3339880	6.76	RELT	RELT tumor necrosis factor receptor
3740367	6.76	SLC43A2	solute carrier family 43 (amino acid system L transporter), member 2
3315181	6.75	CALY	calcyon neuron-specific vesicular protein
2491168	6.75	DNAH6	dynein, axonemal, heavy chain 6
2583374	6.75	PLA2R1	phospholipase A2 receptor 1
3953524	6.75	SCARF2	scavenger receptor class F, member 2
3830412	6.74	FFAR1	free fatty acid receptor 1
3439510	6.73	SLC6A12	solute carrier family 6 (neurotransmitter transporter), member 12
2422722	6.73	TGFBR3	transforming growth factor beta receptor III
2947889	6.72	GABBR1	gamma-aminobutyric acid (GABA) B receptor, 1
2845351	6.72	SLC9A3	solute carrier family 9, subfamily A (NHE3, cation proton antiporter 3), member 3
3009520	6.72	UPK3B	uroplakin 3B
2652027	6.71	CLDN11	claudin 11
3454157	6.71	FAIM2	Fas apoptotic inhibitory molecule 2
3285119	6.71	FZD8	frizzled class receptor 8
2610094	6.71	IL17RC	interleukin 17 receptor C
3645452	6.71	KREMEN2	kringle containing transmembrane protein 2
3035380	6.71	TMEM184A	transmembrane protein 184A
3304767	6.69	CALHM2	calcium homeostasis modulator 2
3747522	6.69	TNFRSF13B	tumor necrosis factor receptor superfamily, member 13B
3568485	6.68	SPTB	spectrin, beta, erythrocytic
3437780	6.67	FZD10	frizzled class receptor 10
3665083	6.67	HSD11B2	hydroxysteroid (11-beta) dehydrogenase 2
3119200	6.67	PSCA	prostate stem cell antigen
3815416	6.66	ABCA7	ATP binding cassette subfamily A member 7
3064293	6.66	EPHB4	EPH receptor B4
3082373	6.66	VIPR2	vasoactive intestinal peptide receptor 2
2777276	6.65	ABCG2	ATP binding cassette subfamily G member 2 (Junior blood group)
3770305	6.65	CD300C	CD300c molecule
2623413	6.65	GPR62	G protein-coupled receptor 62
2907444	6.64	PTCRA	pre T-cell antigen receptor alpha
2754937	6.64	TLR3	toll-like receptor 3
3834744	6.64	TMEM145	transmembrane protein 145
3557069	6.63	CDH24	cadherin 24, type 2
3725685	6.63	NGFR	nerve growth factor receptor
2828520	6.63	SLC22A5	solute carrier family 22 (organic cation/carnitine transporter), member 5
3829242	6.62	LRP3	LDL receptor related protein 3
2743800	6.62	PCDH10	protocadherin 10
3023350	6.62	SMO	smoothened, frizzled class receptor
2845274	6.61	CCDC127	coiled-coil domain containing 127
2360633	6.61	EFNA4	ephrin-A4
3892409	6.61	LSM14B	LSM family member 14B
3740432	6.61	SCARF1	scavenger receptor class F, member 1
3676763	6.6	ABCA3	ATP binding cassette subfamily A member 3
3945040	6.6	GALR3	galanin receptor 3
3473750	6.6	VSIG10	V-set and immunoglobulin domain containing 10
3643143	6.6	WDR90	WD repeat domain 90
3677913	6.59	ADCY9	adenylate cyclase 9
3770345	6.59	CD300E	CD300e molecule
3435980	6.59	TCTN2	tectonic family member 2
2458513	6.59	TMEM63A	transmembrane protein 63A
2320683	6.59	TNFRSF8	tumor necrosis factor receptor superfamily, member 8
3716113	6.59	TP53I13	tumor protein p53 inducible protein 13
3436021	6.58	ATP6V0A2	ATPase, H+ transporting, lysosomal V0 subunit a2
2600689	6.58	EPHA4	EPH receptor A4
3385509	6.58	FZD4	frizzled class receptor 4
2748198	6.58	KIAA0922	KIAA0922
3081613	6.58	LMBR1	limb development membrane protein 1
3194832	6.58	MAMDC4	MAM domain containing 4
3841184	6.57	CACNG6	calcium channel, voltage-dependent, gamma subunit 6
3257098	6.57	FAS	Fas cell surface death receptor
3168160	6.57	NPR2	natriuretic peptide receptor 2
2956052	6.57	TNFRSF21	tumor necrosis factor receptor superfamily, member 21
2974592	6.57	VNN1	vanin 1
3057499	6.56	HIP1	huntingtin interacting protein 1
3892565	6.56	OSBPL2	oxysterol binding protein-like 2
3250990	6.56	UNC5B	unc-5 netrin receptor B
3091746	6.55	FZD3	frizzled class receptor 3
2435251	6.55	LINGO4	leucine rich repeat and Ig domain containing 4
3946495	6.55	MCHR1	melanin-concentrating hormone receptor 1
2837970	6.54	ADRA1B	adrenoceptor alpha 1B
3265140	6.54	ADRB1	adrenoceptor beta 1
2899333	6.54	BTN3A2	butyrophilin, subfamily 3, member A2
2878437	6.54	CD14	CD14 molecule
3063807	6.54	GPC2	glypican 2
2327659	6.54	OPRD1	opioid receptor, delta 1
2409507	6.53	SLC6A9	solute carrier family 6 (neurotransmitter transporter, glycine), member 9
2343418	6.52	PTGFR	prostaglandin F receptor (FP)
3340449	6.52	SLCO2B1	solute carrier organic anion transporter family, member 2B1
4054405	6.51	GJA4	gap junction protein alpha 4
2392945	6.51	LINC00982	long intergenic non-protein coding RNA 982
2331679	6.51	MFSD2A	major facilitator superfamily domain containing 2A
2883440	6.5	ADAM19	ADAM metallopeptidase domain 19
3498315	6.5	UBAC2	UBA domain containing 2
2842194	6.48	CPLX2	complexin 2
2348962	6.48	GPR88	G protein-coupled receptor 88
3860045	6.48	NPHS1	nephrosis 1, congenital, Finnish type (nephrin)
3457336	6.48	PMEL	premelanosome protein
3133345	6.48	SLC20A2	solute carrier family 20 (phosphate transporter), member 2
2899413	6.47	BTN3A3	butyrophilin, subfamily 3, member A3
2545953	6.46	FNDC4	fibronectin type III domain containing 4
3686278	6.46	GSG1L	GSG1-like
2524301	6.46	NRP2	neuropilin 2
2635906	6.46	PHLDB2	pleckstrin homology-like domain, family B, member 2
2315674	6.46	SCNN1D	sodium channel, non voltage gated 1 delta subunit
3743371	6.45	ASGR1	asialoglycoprotein receptor 1
3818446	6.45	CRB3	crumbs family member 3
3417842	6.45	LRP1	LDL receptor related protein 1
2722823	6.45	PCDH7	protocadherin 7
3708399	6.45	SLC2A4	solute carrier family 2 (facilitated glucose transporter), member 4
2402942	6.45	SLC9A1	solute carrier family 9, subfamily A (NHE1, cation proton antiporter 1), member 1
2731496	6.44	EPGN	epithelial mitogen
2577028	6.43	NCKAP5	NCK-associated protein 5
2995589	6.42	AQP1	aquaporin 1 (Colton blood group)
2643592	6.41	EPHB1	EPH receptor B1
3157178	6.41	LY6D	lymphocyte antigen 6 complex, locus D
2550325	6.41	OXER1	oxoeicosanoid (OXE) receptor 1
2437401	6.41	RUSC1-AS1	RUSC1 antisense RNA 1
3960042	6.41	SSTR3	somatostatin receptor 3
2717846	6.4	GPR78	G protein-coupled receptor 78
2805939	6.4	RXFP3	relaxin/insulin-like family peptide receptor 3
3895891	6.39	ADRA1D	adrenoceptor alpha 1D
2954025	6.39	TRERF1	transcriptional regulating factor 1
2394608	6.38	GPR153	G protein-coupled receptor 153
3665936	6.38	NRN1L	neuritin 1-like
2934451	6.38	SLC22A1	solute carrier family 22 (organic cation transporter), member 1
3758062	6.37	CCR10	chemokine (C-C motif) receptor 10
3907711	6.37	CDH22	cadherin 22, type 2
2408994	6.37	CLDN19	claudin 19
2976113	6.37	IFNGR1	interferon gamma receptor 1
2332812	6.36	ERMAP	erythroblast membrane-associated protein (Scianna blood group)
2942363	6.36	GFOD1	glucose-fructose oxidoreductase domain containing 1
3820469	6.35	ICAM5	intercellular adhesion molecule 5
2461037	6.35	PCNXL2	pecanex-like 2 (Drosophila)
2956217	6.35	PTCHD4	patched domain containing 4
2631556	6.34	CADM2	cell adhesion molecule 2
3848525	6.34	CLEC4G	C-type lectin domain family 4, member G
2370317	6.34	MR1	major histocompatibility complex, class I-related
2921022	6.33	GPR6	G protein-coupled receptor 6
3771602	6.33	RHBDF2	rhomboid 5 homolog 2 (Drosophila)
2717757	6.32	TRMT44	tRNA methyltransferase 44 homolog (S. cerevisiae)
2350818	6.31	GPR61	G protein-coupled receptor 61
3464747	6.31	KITLG	KIT ligand
3645322	6.31	PRSS41	protease, serine 41
3502632	6.31	TMCO3	transmembrane and coiled-coil domains 3
3659966	6.3	ADCY7	adenylate cyclase 7
3835777	6.3	BCAM	basal cell adhesion molecule (Lutheran blood group)
3453774	6.3	LMBR1L	limb development membrane protein 1-like
2832392	6.3	PCDHB16	protocadherin beta 16
3786920	6.3	SIGLEC15	sialic acid binding Ig-like lectin 15
3839499	6.29	ACPT	acid phosphatase, testicular
2358393	6.29	ADAMTSL4	ADAMTS like 4
2544484	6.29	ADCY3	adenylate cyclase 3
3815268	6.29	KISS1R	KISS1 receptor
3332403	6.29	MS4A1	membrane-spanning 4-domains, subfamily A, member 1
2429914	6.28	IGSF3	immunoglobulin superfamily, member 3
2864449	6.28	SERINC5	serine incorporator 5
2527655	6.27	GPBAR1	G protein-coupled bile acid receptor 1
2640886	6.27	PODXL2	podocalyxin-like 2
3657219	6.27	SLC5A2	solute carrier family 5 (sodium/glucose cotransporter), member 2
2796995	6.27	SORBS2	sorbin and SH3 domain containing 2
3452478	6.25	AMIGO2	adhesion molecule with Ig-like domain 2
3553389	6.25	AMN	amnion associated transmembrane protein
3652271	6.25	C16orf52	chromosome 16 open reading frame 52
3980170	6.25	EFNB1	ephrin-B1
2439052	6.25	FCRL2	Fc receptor-like 2
3848243	6.25	INSR	insulin receptor
3357885	6.25	SIGIRR	single immunoglobulin and toll-interleukin 1 receptor (TIR) domain
3250373	6.25	TSPAN15	tetraspanin 15
3060117	6.24	ABCB4	ATP binding cassette subfamily B member 4
3293724	6.24	C10orf54	chromosome 10 open reading frame 54
3622239	6.24	DUOXA1	dual oxidase maturation factor 1
3402814	6.24	GPR162	G protein-coupled receptor 162
3634256	6.24	LINGO1	leucine rich repeat and Ig domain containing 1
3309112	6.24	PRLHR	prolactin releasing hormone receptor
2362892	6.23	ATP1A2	ATPase, Na+/K+ transporting, alpha 2 polypeptide
3457101	6.23	ITGA7	integrin alpha 7
3434760	6.22	P2RX4	purinergic receptor P2X, ligand gated ion channel, 4
3292946	6.22	TACR2	tachykinin receptor 2
3396770	6.21	CDON	cell adhesion associated, oncogene regulated
2950970	6.21	GRM4	glutamate receptor, metabotropic 4
3918447	6.21	IFNAR2	interferon (alpha, beta and omega) receptor 2
2418078	6.21	NEGR1	neuronal growth regulator 1
3414885	6.21	SLC4A8	solute carrier family 4, sodium bicarbonate cotransporter, member 8
2899298	6.2	BTN3A2	butyrophilin, subfamily 3, member A2
3834405	6.2	CEACAM3	carcinoembryonic antigen-related cell adhesion molecule 3
3952512	6.2	DGCR14	DiGeorge syndrome critical region gene 14
2596763	6.19	FZD5	frizzled class receptor 5
4046481	6.19	ING5	inhibitor of growth family member 5
3357237	6.19	JAM3	junctional adhesion molecule 3
2662297	6.19	LHFPL4	lipoma HMGIC fusion partner-like 4
3077214	6.19	OR9A2	olfactory receptor, family 9, subfamily A, member 2
3589822	6.18	DISP2	dispatched homolog 2 (Drosophila)
2954596	6.18	DLK2	delta-like 2 homolog (Drosophila)
3007829	6.18	FZD9	frizzled class receptor 9
2506570	6.18	GPR39	G protein-coupled receptor 39
3937900	6.18	P2RX6	purinergic receptor P2X, ligand gated ion channel, 6
3960337	6.18	SLC16A8	solute carrier family 16 (monocarboxylate transporter), member 8
3774701	6.17	CCDC57	coiled-coil domain containing 57
2918982	6.17	GRIK2	glutamate receptor, ionotropic, kainate 2
3293312	6.17	NPFFR1	neuropeptide FF receptor 1
3264059	6.16	ADRA2A	adrenoceptor alpha 2A
3496916	6.16	GPR180	G protein-coupled receptor 180
3755510	6.16	PLXDC1	plexin domain containing 1
3421706	6.16	RAB3IP	RAB3A interacting protein
2675998	6.16	TLR9	toll-like receptor 9
3011492	6.15	ADAM22	ADAM metallopeptidase domain 22
2496962	6.15	IL1R1	interleukin 1 receptor, type I
3337516	6.14	LRP5	LDL receptor related protein 5
3895552	6.13	ADAM33	ADAM metallopeptidase domain 33
3759824	6.13	ARHGAP27	Rho GTPase activating protein 27
2899437	6.13	BTN2A1	butyrophilin, subfamily 2, member A1
3461341	6.13	CPM	carboxypeptidase M
3167553	6.13	IL11RA	interleukin 11 receptor, alpha
2832403	6.13	PCDHB9	protocadherin beta 9
3852735	6.13	PTGER1	prostaglandin E receptor 1
2991150	6.13	TSPAN13	tetraspanin 13
3284302	6.12	NRP1	neuropilin 1
2878943	6.12	PCDH1	protocadherin 1
2939298	6.12	SLC22A23	solute carrier family 22, member 23
3526772	6.12	TMEM255B	transmembrane protein 255B
2536217	6.11	ANO7	anoctamin 7
2881370	6.11	CD74	CD74 molecule, major histocompatibility complex, class II invariant chain
2513471	6.1	SCN2A	sodium channel, voltage gated, type II alpha subunit
3334633	6.1	SLC22A11	solute carrier family 22 (organic anion/urate transporter), member 11
2532314	6.09	ALPI	alkaline phosphatase, intestinal
3188478	6.09	CRB2	crumbs family member 2
3380080	6.09	ORAOV1	oral cancer overexpressed 1
3019158	6.08	LRRN3	leucine rich repeat neuronal 3
3157311	6.08	LY6H	lymphocyte antigen 6 complex, locus H
3887452	6.08	SLC2A10	solute carrier family 2 (facilitated glucose transporter), member 10
2821413	6.07	LNPEP	leucyl/cystinyl aminopeptidase
2726384	6.07	SLC10A4	solute carrier family 10, member 4
3334659	6.07	SLC22A12	solute carrier family 22 (organic anion/urate transporter), member 12
3087659	6.07	SLC7A2	solute carrier family 7 (cationic amino acid transporter, y+ system), member 2
2478269	6.07	TMEM178A	transmembrane protein 178A
3836903	6.06	FKRP	fukutin related protein
2439861	6.06	IGSF9	immunoglobulin superfamily, member 9
2437118	6.06	MUC1	mucin 1, cell surface associated
3353876	6.06	OR10G9	olfactory receptor, family 10, subfamily G, member 9
2401774	6.05	IFNLR1	interferon, lambda receptor 1
2610056	6.05	IL17RE	interleukin 17 receptor E
2502842	6.05	TMEM37	transmembrane protein 37
3666409	6.04	CDH1	cadherin 1, type 1
3767230	6.04	LRRC37A3	leucine rich repeat containing 37, member A3
3375041	6.03	PTGDR2	prostaglandin D2 receptor 2
3846860	6.03	SEMA6B	sema domain, transmembrane domain (TM), and cytoplasmic domain, (semaphorin) 6B
2843131	6.03	SLC34A1	solute carrier family 34 (type II sodium/phosphate cotransporter), member 1
2708287	6.02	ABCC5	ATP binding cassette subfamily C member 5
3741300	6.02	OR1D5	olfactory receptor, family 1, subfamily D, member 5
3858907	6.02	SLC7A10	solute carrier family 7 (neutral amino acid transporter light chain, asc system), member 10
2497252	6.02	SLC9A2	solute carrier family 9, subfamily A (NHE2, cation proton antiporter 2), member 2
3406329	6.01	PTPRO	protein tyrosine phosphatase, receptor type, O
3217361	5.99	ANKS6	ankyrin repeat and sterile alpha motif domain containing 6
2895841	5.99	CD83	CD83 molecule
3638411	5.99	RHCG	Rh family, C glycoprotein
2427469	5.98	SLC16A4	solute carrier family 16, member 4
3708553	5.96	NLGN2	neuroligin 2
3713627	5.96	SLC5A10	solute carrier family 5 (sodium/sugar cotransporter), member 10
3723671	5.96	SPPL2C	signal peptide peptidase like 2C
3759105	5.95	FAM171A2	family with sequence similarity 171, member A2
3359134	5.95	IGF2; INS-IGF2	insulin-like growth factor 2; INS-IGF2 readthrough
3859899	5.95	IGFLR1	IGF like family receptor 1
2361761	5.95	NTRK1	neurotrophic tyrosine kinase, receptor, type 1
3706651	5.95	OR3A3	olfactory receptor, family 3, subfamily A, member 3
3750685	5.95	SLC46A1	solute carrier family 46 (folate transporter), member 1
3734236	5.95	TTYH2	tweety family member 2
3614534	5.94	GABRB3	gamma-aminobutyric acid (GABA) A receptor, beta 3
3073267	5.94	PLXNA4	plexin A4
2988594	5.94	SLC29A4	solute carrier family 29 (equilibrative nucleoside transporter), member 4
3351688	5.94	UPK2	uroplakin 2
2340078	5.93	CACHD1	cache domain containing 1
3646156	5.93	VASN	vasorin
3767465	5.92	AXIN2	axin 2
2322264	5.92	CLCNKB	chloride channel, voltage-sensitive Kb
3723071	5.92	DBF4B	DBF4 zinc finger B
3436117	5.92	DNAH10	dynein, axonemal, heavy chain 10
3840562	5.92	ERVV-1	endogenous retrovirus group V, member 1
2325410	5.92	NIPAL3	NIPA-like domain containing 3
3939498	5.92	SLC2A11	solute carrier family 2 (facilitated glucose transporter), member 11
2361635	5.91	BCAN	brevican
7385641	5.91	CLSTN2	calsyntenin 2
3941793	5.91	KREMEN1	kringle containing transmembrane protein 1
3461795	5.91	PTPRB	protein tyrosine phosphatase, receptor type, B
2717253	5.91	SORCS2	sortilin-related VPS10 domain containing receptor 2
2509557	5.9	ACVR2A	activin A receptor type IIA
2715016	5.9	FGFR3	fibroblast growth factor receptor 3
3555067	5.9	KIAA0125	KIAA0125
3611684	5.9	LRRK1	leucine-rich repeat kinase 1
2905296	5.9	PI16	peptidase inhibitor 16
2434805	5.9	SEMA6C	sema domain, transmembrane domain (TM), and cytoplasmic domain, (semaphorin) 6C
2672821	5.89	CSPG5	chondroitin sulfate proteoglycan 5 (neuroglycan C)
2809245	5.89	ITGA2	integrin, alpha 2 (CD49B, alpha 2 subunit of VLA-2 receptor)
3629948	5.89	MEGF11	multiple EGF-like-domains 11
2845921	5.89	SLC6A3	solute carrier family 6 (neurotransmitter transporter), member 3
3969081	5.89	TLR7	toll-like receptor 7
3854693	5.88	IL12RB1	interleukin 12 receptor, beta 1
3883207	5.88	PROCR	protein C receptor, endothelial
2562932	5.87	CD8A	CD8a molecule
3068587	5.87	GPR85	G protein-coupled receptor 85
3620022	5.87	LTK	leukocyte receptor tyrosine kinase
2906749	5.87	NCR2	natural cytotoxicity triggering receptor 2
4007899	5.87	SYP	synaptophysin
3415109	5.86	ACVRL1	activin A receptor type IL
3662696	5.86	CX3CL1	chemokine (C-X3-C motif) ligand 1
3854954	5.86	LRRC25	leucine rich repeat containing 25
3438482	5.86	MMP17	matrix metallopeptidase 17 (membrane-inserted)
2756831	5.86	SLC26A1	solute carrier family 26 (anion exchanger), member 1
3852586	5.85	ADGRL1	adhesion G protein-coupled receptor L1
3839718	5.85	CD33	CD33 molecule
2401251	5.85	HTR1D	5-hydroxytryptamine (serotonin) receptor 1D, G protein-coupled
3379777	5.85	MRGPRF	MAS-related GPR, member F
2603544	5.85	NMUR1	neuromedin U receptor 1
3841439	5.85	TTYH1	tweety family member 1
2931036	5.85	ULBP1	UL16 binding protein 1
3403244	5.84	CLSTN3	calsyntenin 3
3837759	5.84	GRIN2D	glutamate receptor, ionotropic, N-methyl D-aspartate 2D
2674748	5.83	CDHR4	cadherin-related family member 4
3835035	5.82	CD177	CD177 molecule
3220384	5.82	LPAR1	lysophosphatidic acid receptor 1
3726252	5.82	SGCA	sarcoglycan alpha
3837269	5.81	C5AR2	complement component 5a receptor 2
2362537	5.81	FCER1A	Fc fragment of IgE, high affinity I, receptor for; alpha polypeptide
3376914	5.81	NRXN2	neurexin 2
2673181	5.81	PLXNB1	plexin B1
2493943	5.81	PROM2	prominin 2
3351975	5.8	ABCG4	ATP binding cassette subfamily G member 4
3411721	5.8	CNTN1	contactin 1
3723627	5.8	CRHR1	corticotropin releasing hormone receptor 1
3394488	5.8	PVRL1	poliovirus receptor-related 1 (herpesvirus entry mediator C)
2328387	5.79	HCRTR1	hypocretin (orexin) receptor 1
3702429	5.79	KCNG4	potassium channel, voltage gated modifier subfamily G, member 4
3645601	5.79	MMP25	matrix metallopeptidase 25
2453365	5.79	PLXNA2	plexin A2
3354293	5.79	ROBO3	roundabout guidance receptor 3
2489470	5.79	SEMA4F	sema domain, immunoglobulin domain (Ig), transmembrane domain (TM) and short cytoplasmic domain, (semaphorin) 4F
2623922	5.79	STAB1	stabilin 1
3831006	5.78	LRFN3	leucine rich repeat and fibronectin type III domain containing 3
3893947	5.78	OPRL1	opiate receptor-like 1
3504134	5.77	GJA3	gap junction protein alpha 3
3735151	5.77	ITGB4	integrin beta 4
2692199	5.77	SEMA5B	sema domain, seven thrombospondin repeats (type 1 and type 1-like), transmembrane domain (TM) and short cytoplasmic domain, (semaphorin) 5B
3895614	5.77	SIGLEC1	sialic acid binding Ig-like lectin 1, sialoadhesin
3519840	5.77	SLITRK6	SLIT and NTRK-like family, member 6
3945942	5.76	CACNA1I	calcium channel, voltage-dependent, T type, alpha 1I subunit
3866094	5.76	PTGIR	prostaglandin I2 (prostacyclin) receptor (IP)
2662698	5.75	ATP2B2	ATPase, Ca++ transporting, plasma membrane 2
2427117	5.74	AMIGO1	adhesion molecule with Ig-like domain 1
3489335	5.74	MLNR	motilin receptor
2979159	5.74	RAET1E	retinoic acid early transcript 1E
2418570	5.74	SLC44A5	solute carrier family 44, member 5
3156541	5.74	SLC45A4	solute carrier family 45, member 4
2323790	5.73	HTR6	5-hydroxytryptamine (serotonin) receptor 6, G protein-coupled
3360505	5.73	OR51B2	olfactory receptor, family 51, subfamily B, member 2 (gene/pseudogene)
2837029	5.73	SGCD	sarcoglycan delta
2835386	5.73	SLC6A7	solute carrier family 6 (neurotransmitter transporter), member 7
3830353	5.72	CD22	CD22 molecule
3912936	5.72	HRH3	histamine receptor H3
2671936	5.72	SLC6A20	solute carrier family 6 (proline IMINO transporter), member 20
3654175	5.71	IL4R	interleukin 4 receptor
3421985	5.71	KCNMB4	potassium channel subfamily M regulatory beta subunit 4
3192353	5.71	NTNG2	netrin G2
3495968	5.71	SLITRK5	SLIT and NTRK-like family, member 5
3706950	5.71	SPNS3	spinster homolog 3 (Drosophila)
2324820	5.7	EPHA8	EPH receptor A8
2987843	5.7	SDK1	sidekick cell adhesion molecule 1
3869078	5.7	SIGLEC12	sialic acid binding Ig-like lectin 12 (gene/pseudogene)
3855856	5.69	LPAR2	lysophosphatidic acid receptor 2
3245881	5.69	WDFY4	WDFY family member 4
3723128	5.68	ADAM11	ADAM metallopeptidase domain 11
3770422	5.68	GRIN2C	glutamate receptor, ionotropic, N-methyl D-aspartate 2C
3871192	5.68	PTPRH	protein tyrosine phosphatase, receptor type, H
3839619	5.68	SIGLEC9	sialic acid binding Ig-like lectin 9
2877861	5.68	SLC23A1	solute carrier family 23 (ascorbic acid transporter), member 1
2766262	5.68	TLR6	toll-like receptor 6
3545634	5.67	NRXN3	neurexin 3
3847112	5.67	PTPRS	protein tyrosine phosphatase, receptor type, S
3470523	5.67	SELPLG	selectin P ligand
3738820	5.67	UTS2R	urotensin 2 receptor
3864519	5.66	CADM4	cell adhesion molecule 4
2511153	5.66	KCNJ3	potassium channel, inwardly rectifying subfamily J, member 3
3397003	5.66	KIRREL3	kin of IRRE like 3 (Drosophila)
3459120	5.66	LRIG3	leucine-rich repeats and immunoglobulin-like domains 3
3129026	5.65	CHRNA2	cholinergic receptor, nicotinic alpha 2
3645549	5.65	CLDN9	claudin 9
2540658	5.65	NTSR2	neurotensin receptor 2
3774906	5.65	SECTM1	secreted and transmembrane 1
3715614	5.65	SLC13A2	solute carrier family 13 (sodium-dependent dicarboxylate transporter), member 2
3550234	5.64	C14orf132	chromosome 14 open reading frame 132
3674249	5.64	DPEP1	dipeptidase 1 (renal)
3654227	5.64	IL21R	interleukin 21 receptor
2995667	5.63	ADCYAP1R1	adenylate cyclase activating polypeptide 1 (pituitary) receptor type I
3414315	5.63	AQP5	aquaporin 5
2636319	5.63	BOC	BOC cell adhesion associated, oncogene regulated
2407359	5.63	EPHA10	EPH receptor A10
2987038	5.63	GPER1	G protein-coupled estrogen receptor 1
2952323	5.63	MDGA1	MAM domain containing glycosylphosphatidylinositol anchor 1
3255361	5.63	RGR	retinal G protein coupled receptor
2971267	5.63	ROS1	ROS proto-oncogene 1 , receptor tyrosine kinase
3632907	5.63	SEMA7A	semaphorin 7A, GPI membrane anchor (John Milton Hagen blood group)
2693014	5.63	SLC12A8	solute carrier family 12, member 8
3643938	5.63	TMEM204	transmembrane protein 204
3000984	5.62	ABCA13	ATP binding cassette subfamily A member 13
3318639	5.62	CCKBR	cholecystokinin B receptor
3230141	5.62	NOTCH1	notch 1
2979267	5.62	ULBP3	UL16 binding protein 3
2565082	5.61	ADRA2B	adrenoceptor alpha 2B
2326463	5.61	CD52	CD52 molecule
3934729	5.61	ITGB2	integrin, beta 2 (complement component 3 receptor 3 and 4 subunit)
3688120	5.61	STX1B	syntaxin 1B
3735392	5.61	ZACN	zinc activated ligand-gated ion channel
3863380	5.6	GRIK5	glutamate receptor, ionotropic, kainate 5
2465897	5.6	OR2T12	olfactory receptor, family 2, subfamily T, member 12
3609004	5.6	ST8SIA2	ST8 alpha-N-acetyl-neuraminide alpha-2,8-sialyltransferase 2
3978155	5.59	GPR173	G protein-coupled receptor 173
2347625	5.59	SLC44A3	solute carrier family 44, member 3
3880084	5.59	SSTR4	somatostatin receptor 4
3332663	5.58	CD6	CD6 molecule
2842911	5.58	FGFR4	fibroblast growth factor receptor 4
2438612	5.58	INSRR	insulin receptor-related receptor
2950329	5.57	HLA-DPA1	major histocompatibility complex, class II, DP alpha 1
3601051	5.57	NEO1	neogenin 1
3229797	5.57	QSOX2	quiescin Q6 sulfhydryl oxidase 2
3939875	5.57	SUSD2	sushi domain containing 2
2619265	5.57	VIPR1	vasoactive intestinal peptide receptor 1
2955638	5.56	CLIC5	chloride intracellular channel 5
3759137	5.56	ITGA2B	integrin alpha 2b
3639601	5.56	RGMA	repulsive guidance molecule family member a
2524653	5.55	ADAM23	ADAM metallopeptidase domain 23
3213120	5.55	GAS1	growth arrest-specific 1
2349129	5.55	S1PR1	sphingosine-1-phosphate receptor 1
3824623	5.55	SLC5A5	solute carrier family 5 (sodium/iodide cotransporter), member 5
3478068	5.55	TMEM132D	transmembrane protein 132D
3673892	5.54	CDH15	cadherin 15, type 1, M-cadherin (myotubule)
2742581	5.54	FAT4	FAT atypical cadherin 4
2505779	5.53	GPR148	G protein-coupled receptor 148
3439132	5.53	P2RX2	purinergic receptor P2X, ligand gated ion channel, 2
3687277	5.53	SEZ6L2	seizure related 6 homolog (mouse)-like 2
2936731	5.53	UNC93A	unc-93 homolog A (C. elegans)
3028858	5.52	EPHB6	EPH receptor B6
3203935	5.52	KIF24	kinesin family member 24
3533184	5.52	SSTR1	somatostatin receptor 1
2432607	5.51	GNRHR2	gonadotropin releasing hormone receptor 2, pseudogene
3892873	5.51	NTSR1	neurotensin receptor 1 (high affinity)
3741374	5.51	OR1E1	olfactory receptor, family 1, subfamily E, member 1
3373046	5.51	OR4C12	olfactory receptor, family 4, subfamily C, member 12
3516639	5.51	PCDH9	protocadherin 9
3645338	5.51	PRSS21	protease, serine, 21 (testisin)
2799030	5.51	SLC6A19	solute carrier family 6 (neutral amino acid transporter), member 19
2617752	5.5	ACVR2B	activin A receptor type IIB
3384704	5.5	DLG2	discs, large homolog 2 (Drosophila)
2950307	5.5	HLA-DOA	major histocompatibility complex, class II, DO alpha
3864375	5.5	LYPD3	LY6/PLAUR domain containing 3
3894365	5.5	SLC52A3	solute carrier family 52 (riboflavin transporter), member 3
2669979	5.49	CX3CR1	chemokine (C-X3-C motif) receptor 1
2858752	5.49	ERCC8	excision repair cross-complementation group 8
2816494	5.49	F2RL1	coagulation factor II (thrombin) receptor-like 1
2587790	5.49	GPR155	G protein-coupled receptor 155
3481410	5.49	TNFRSF19	tumor necrosis factor receptor superfamily, member 19
2360346	5.48	CHRNB2	cholinergic receptor, nicotinic beta 2
3552083	5.48	DLK1	delta-like 1 homolog (Drosophila)
3643396	5.48	MSLN	mesothelin
3566495	5.47	C14orf37	chromosome 14 open reading frame 37
3980835	5.47	NLGN3	neuroligin 3
2573112	5.47	SCTR	secretin receptor
2584904	5.47	SLC38A11	solute carrier family 38, member 11
3089799	5.47	TNFRSF10C	tumor necrosis factor receptor superfamily, member 10c, decoy without an intracellular domain
3688254	5.46	PRSS8	protease, serine, 8
2542795	5.46	SDC1	syndecan 1
3221205	5.46	SLC46A2	solute carrier family 46, member 2
3837257	5.45	C5AR1	complement component 5a receptor 1
2952834	5.45	KCNK5	potassium channel, two pore domain subfamily K, member 5
3683549	5.45	UMOD	uromodulin
3332576	5.45	ZP1	zona pellucida glycoprotein 1 (sperm receptor)
3561868	5.44	CLEC14A	C-type lectin domain family 14, member A
3823957	5.44	F2RL3	coagulation factor II (thrombin) receptor-like 3
3884793	5.44	SLC32A1	solute carrier family 32 (GABA vesicular transporter), member 1
4011989	5.43	CXCR3	chemokine (C-X-C motif) receptor 3
2360647	5.43	EFNA3	ephrin-A3
3971451	5.43	PHEX	phosphate regulating endopeptidase homolog, X-linked
2890756	5.42	FLT4	fms-related tyrosine kinase 4
3157138	5.42	LYPD2	LY6/PLAUR domain containing 2
2790062	5.42	TMEM154	transmembrane protein 154
4026798	5.41	L1CAM	L1 cell adhesion molecule
3374793	5.41	OR10V1	olfactory receptor, family 10, subfamily V, member 1
3735383	5.4	GALR2	galanin receptor 2
3629610	5.4	IGDCC3	immunoglobulin superfamily, DCC subclass, member 3
2565592	5.4	SEMA4C	sema domain, immunoglobulin domain (Ig), transmembrane domain (TM) and short cytoplasmic domain, (semaphorin) 4C
3734648	5.4	SLC16A5	solute carrier family 16 (monocarboxylate transporter), member 5
3629652	5.39	IGDCC4	immunoglobulin superfamily, DCC subclass, member 4
3376326	5.39	SLC22A6	solute carrier family 22 (organic anion transporter), member 6
2527747	5.38	SLC11A1	solute carrier family 11 (proton-coupled divalent metal ion transporter), member 1
3391653	5.37	DRD2	dopamine receptor D2
3783481	5.37	DSG3	desmoglein 3
3864551	5.37	PLAUR	plasminogen activator, urokinase receptor
3770052	5.37	SDK2	sidekick cell adhesion molecule 2
3817933	5.37	ZNRF4	zinc and ring finger 4
2405576	5.35	CSMD2	CUB and Sushi multiple domains 2
2363689	5.35	FCGR2A	Fc fragment of IgG, low affinity IIa, receptor (CD32)
2528645	5.34	ASIC4	acid sensing ion channel family member 4
2535927	5.34	GPR35	G protein-coupled receptor 35
3864414	5.34	PHLDB3	pleckstrin homology-like domain, family B, member 3
3077128	5.34	TRPV5	transient receptor potential cation channel, subfamily V, member 5
3414351	5.33	ASIC1	acid sensing ion channel 1
3526655	5.33	ATP4B	ATPase, H+/K+ exchanging, beta polypeptide
3918104	5.33	EVA1C	eva-1 homolog C (C. elegans)
3755089	5.33	GPR179	G protein-coupled receptor 179
3822551	5.33	IL27RA	interleukin 27 receptor, alpha
2404344	5.33	NKAIN1	Na+/K+ transporting ATPase interacting 1
3733911	5.33	SSTR2	somatostatin receptor 2
3726618	5.32	CACNA1G	calcium channel, voltage-dependent, T type, alpha 1G subunit
2403099	5.32	CD164L2	CD164 sialomucin-like 2
2362157	5.32	CD1D	CD1d molecule
2883423	5.32	FNDC9	fibronectin type III domain containing 9
2442911	5.32	GPR161	G protein-coupled receptor 161
3456049	5.32	ITGB7	integrin beta 7
2949132	5.32	NCR3	natural cytotoxicity triggering receptor 3
2717808	5.32	TRMT44	tRNA methyltransferase 44 homolog (S. cerevisiae)
2324416	5.31	ALPL	alkaline phosphatase, liver/bone/kidney
2655845	5.31	EPHB3	EPH receptor B3
2614663	5.31	LRRC3B	leucine rich repeat containing 3B
2376168	5.31	NFASC	neurofascin
2465728	5.31	OR2B11	olfactory receptor, family 2, subfamily B, member 11
2361342	5.31	SEMA4A	sema domain, immunoglobulin domain (Ig), transmembrane domain (TM) and short cytoplasmic domain, (semaphorin) 4A
3107242	5.31	TMEM67	transmembrane protein 67
3015786	5.31	ZAN	zonadhesin (gene/pseudogene)
3830925	5.3	KIRREL2	kin of IRRE like 2 (Drosophila)
2333107	5.3	MPL	MPL proto-oncogene, thrombopoietin receptor
3251023	5.3	SLC29A3	solute carrier family 29 (equilibrative nucleoside transporter), member 3
3742532	5.3	SLC52A1	solute carrier family 52 (riboflavin transporter), member 1
3442641	5.29	CD163L1	CD163 molecule-like 1
3944564	5.29	CSF2RB	colony stimulating factor 2 receptor, beta, low-affinity (granulocyte-macrophage)
3863263	5.29	LYPD4	LY6/PLAUR domain containing 4
3734517	5.29	OTOP2	otopetrin 2
2599704	5.27	CFAP65	cilia and flagella associated protein 65
2666807	5.27	NEK10	NIMA-related kinase 10
3907987	5.27	SLC13A3	solute carrier family 13 (sodium-dependent dicarboxylate transporter), member 3
3335007	5.27	SLC22A20	solute carrier family 22, member 20
2636786	5.27	TIGIT	T-cell immunoreceptor with Ig and ITIM domains
3023318	5.27	TSPAN33	tetraspanin 33
2930957	5.27	ULBP2	UL16 binding protein 2
3332729	5.26	CD5	CD5 molecule
2440586	5.26	PVRL4	poliovirus receptor-related 4
3816827	5.26	S1PR4	sphingosine-1-phosphate receptor 4
2395545	5.26	SLC2A7	solute carrier family 2 (facilitated glucose transporter), member 7
2617188	5.25	ITGA9	integrin alpha 9
3870733	5.25	LILRB2	leukocyte immunoglobulin-like receptor, subfamily B (with TM and ITIM domains), member 2
2390307	5.25	OR2L3	olfactory receptor, family 2, subfamily L, member 3
2845362	5.25	SLC9A3	solute carrier family 9, subfamily A (NHE3, cation proton antiporter 3), member 3
3832256	5.25	SPINT2	serine peptidase inhibitor, Kunitz type, 2
3896594	5.24	LRRN4	leucine rich repeat neuronal 4
2576988	5.24	LYPD1	LY6/PLAUR domain containing 1
3741769	5.24	P2RX1	purinergic receptor P2X, ligand gated ion channel, 1
3417500	5.24	SLC39A5	solute carrier family 39 (zinc transporter), member 5
3444436	5.24	TAS2R14	taste receptor, type 2, member 14
3027943	5.24	TAS2R3	taste receptor, type 2, member 3
3347939	5.23	C11orf87	chromosome 11 open reading frame 87
3385834	5.23	GRM5	glutamate receptor, metabotropic 5
3179646	5.23	SUSD3	sushi domain containing 3
2692319	5.22	ADCY5	adenylate cyclase 5
3655109	5.22	CD19	CD19 molecule
2696113	5.22	SLCO2A1	solute carrier organic anion transporter family, member 2A1
3184925	5.22	ZNF483	zinc finger protein 483
3376560	5.21	ATL3	atlastin GTPase 3
3694215	5.21	CDH8	cadherin 8, type 2
2453036	5.21	FCAMR	Fc receptor, IgA, IgM, high affinity
3734342	5.21	GPR142	G protein-coupled receptor 142
2842624	5.2	CDHR2	cadherin-related family member 2
3077321	5.2	EPHA1	EPH receptor A1
2836242	5.2	GRIA1	glutamate receptor, ionotropic, AMPA 1
3934407	5.2	ICOSLG	inducible T-cell co-stimulator ligand
3048712	5.2	NPC1L1	NPC1-like 1
3360529	5.2	OR51I1	olfactory receptor, family 51, subfamily I, member 1
3393652	5.2	SCN2B	sodium channel, voltage gated, type II beta subunit
2383524	5.2	ZNF678	zinc finger protein 678
3393311	5.19	DSCAML1	Down syndrome cell adhesion molecule like 1
2907671	5.19	PTK7	protein tyrosine kinase 7 (inactive)
3778772	5.18	APCDD1	adenomatosis polyposis coli down-regulated 1
3334174	5.18	FLRT1	fibronectin leucine rich transmembrane protein 1
2401753	5.18	IL22RA1	interleukin 22 receptor, alpha 1
2350489	5.18	KIAA1324	KIAA1324
3617712	5.17	GJD2	gap junction protein delta 2
2899393	5.16	BTN2A3P	butyrophilin, subfamily 2, member A3, pseudogene
3188514	5.15	CRB2	crumbs family member 2
3590239	5.15	DLL4	delta-like 4 (Drosophila)
2758978	5.15	EVC2	Ellis van Creveld syndrome 2
2911003	5.15	HCRTR2	hypocretin (orexin) receptor 2
3830320	5.15	MAG	myelin associated glycoprotein
3379744	5.15	MRGPRD	MAS-related GPR, member D
3360287	5.15	OR51S1	olfactory receptor, family 51, subfamily S, member 1
3331217	5.15	P2RX3	purinergic receptor P2X, ligand gated ion channel, 3
3995666	5.14	ATP2B3	ATPase, Ca++ transporting, plasma membrane 3
2844908	5.14	BTNL9	butyrophilin-like 9
3592214	5.14	DUOX1	dual oxidase 1
2732655	5.14	FRAS1	Fraser extracellular matrix complex subunit 1
3378851	5.14	GPR152	G protein-coupled receptor 152
2711610	5.14	LRRC15	leucine rich repeat containing 15
2832378	5.14	PCDHB7	protocadherin beta 7
3000276	5.14	RAMP3	receptor (G protein-coupled) activity modifying protein 3
2889848	5.13	GRM6	glutamate receptor, metabotropic 6
2712236	5.13	MUC4	mucin 4, cell surface associated
2359780	5.13	NPR1	natriuretic peptide receptor 1
2799056	5.13	SLC6A18	solute carrier family 6 (neutral amino acid transporter), member 18
3418249	5.12	KIF5A	kinesin family member 5A
3377385	5.12	NAALADL1	N-acetylated alpha-linked acidic dipeptidase-like 1
3028923	5.12	OR6V1	olfactory receptor, family 6, subfamily V, member 1
2532378	5.11	CHRND	cholinergic receptor, nicotinic delta
3653677	5.1	AQP8	aquaporin 8
3841134	5.1	CACNG7	calcium channel, voltage-dependent, gamma subunit 7
3251068	5.1	CDH23	cadherin-related 23
3361072	5.1	DCHS1	dachsous cadherin-related 1
2964139	5.1	GABRR2	gamma-aminobutyric acid (GABA) A receptor, rho 2
2690715	5.1	IGSF11	immunoglobulin superfamily, member 11
3332015	5.1	OR4D10	olfactory receptor, family 4, subfamily D, member 10
3655574	5.1	SPN	sialophorin
2671728	5.09	CDCP1	CUB domain containing protein 1
2832387	5.09	PCDHB8	protocadherin beta 8
2463567	5.09	PLD5	phospholipase D family, member 5
3707175	5.09	TM4SF5	transmembrane 4 L six family member 5
2368180	5.08	GPR52	G protein-coupled receptor 52
3362852	5.08	MRVI1	murine retrovirus integration site 1 homolog
2674919	5.08	MST1R	macrophage stimulating 1 receptor
2832423	5.08	PCDHB10	protocadherin beta 10
3214496	5.08	ROR2	receptor tyrosine kinase-like orphan receptor 2
3393622	5.08	SCN4B	sodium channel, voltage gated, type IV beta subunit
3298337	5.07	LRIT1	leucine-rich repeat, immunoglobulin-like and transmembrane domains 1
3260895	5.07	SEMA4G	sema domain, immunoglobulin domain (Ig), transmembrane domain (TM) and short cytoplasmic domain, (semaphorin) 4G
3376367	5.07	SLC22A8	solute carrier family 22 (organic anion transporter), member 8
2497301	5.07	TMEM182	transmembrane protein 182
3470927	5.07	TRPV4	transient receptor potential cation channel, subfamily V, member 4
3838385	5.06	CD37	CD37 molecule
2546409	5.05	ALK	anaplastic lymphoma receptor tyrosine kinase
3638607	5.05	ANPEP	alanyl (membrane) aminopeptidase
3794641	5.05	GALR1	galanin receptor 1
3349293	5.05	NCAM1	neural cell adhesion molecule 1
2395564	5.05	SLC2A5	solute carrier family 2 (facilitated glucose/fructose transporter), member 5
3222534	5.04	ASTN2	astrotactin 2
2376299	5.04	CNTN2	contactin 2 (axonal)
2437554	5.04	ERVK-7	endogenous retrovirus group K, member 7
2363808	5.04	FCGR2B	Fc fragment of IgG, low affinity IIb, receptor (CD32)
2907887	5.04	SLC22A7	solute carrier family 22 (organic anion transporter), member 7
3461981	5.04	TSPAN8	tetraspanin 8
2532272	5.03	ALPP	alkaline phosphatase, placental
3314630	5.03	CFAP46	cilia and flagella associated protein 46
3630736	5.03	ITGA11	integrin alpha 11
2512790	5.03	SLC4A10	solute carrier family 4, sodium bicarbonate transporter, member 10
3953911	5.03	SLC7A4	solute carrier family 7, member 4
2703836	5.03	SLITRK3	SLIT and NTRK-like family, member 3
3718236	5.03	TMEM132E	transmembrane protein 132E
3401086	5.02	CACNA1C	calcium channel, voltage-dependent, L type, alpha 1C subunit
3378183	5.02	CD248	CD248 molecule, endosialin
2929571	5.02	GRM1	glutamate receptor, metabotropic 1
2641769	5.02	RHO	rhodopsin
2700332	5.02	TM4SF18	transmembrane 4 L six family member 18
2648305	5.01	P2RY1	purinergic receptor P2Y, G-protein coupled, 1
3393891	5.01	TREH	trehalase
2644418	5	CLDN18	claudin 18
2995608	5	GHRHR	growth hormone releasing hormone receptor
3766621	5	ICAM2	intercellular adhesion molecule 2
2954176	5	PRPH2	peripherin 2 (retinal degeneration, slow)
3064361	4.99	ACHE	acetylcholinesterase (Yt blood group)
3674500	4.99	MC1R	melanocortin 1 receptor (alpha melanocyte stimulating hormone receptor)
2832499	4.99	PCDHB15	protocadherin beta 15
3929237	4.99	TCP10L	t-complex 10-like
2521278	4.98	CCDC150	coiled-coil domain containing 150
3723005	4.98	FZD2	frizzled class receptor 2
3576411	4.98	GPR68	G protein-coupled receptor 68
2376548	4.98	MFSD4	major facilitator superfamily domain containing 4
3318517	4.98	OR52N2	olfactory receptor, family 52, subfamily N, member 2
2950263	4.97	HLA-DMB	major histocompatibility complex, class II, DM beta
2452187	4.97	LRRN2	leucine rich repeat neuronal 2
3356539	4.97	NTM	neurotrimin
3339722	4.97	P2RY2	purinergic receptor P2Y, G-protein coupled, 2
2949488	4.97	SLC44A4	solute carrier family 44, member 4
3298557	4.96	GRID1	glutamate receptor, ionotropic, delta 1
3226303	4.96	NAIF1	nuclear apoptosis inducing factor 1
3867842	4.96	SLC17A7	solute carrier family 17 (vesicular glutamate transporter), member 7
3161113	4.95	PDCD1LG2	programmed cell death 1 ligand 2
3722039	4.95	RAMP2	receptor (G protein-coupled) activity modifying protein 2
3633578	4.94	CSPG4	chondroitin sulfate proteoglycan 4
3859703	4.94	FAM187B	family with sequence similarity 187, member B
4023633	4.94	GPR101	G protein-coupled receptor 101
2904836	4.94	LHFPL5	lipoma HMGIC fusion partner-like 5
2621032	4.94	PTH1R	parathyroid hormone 1 receptor
2413115	4.94	SLC1A7	solute carrier family 1 (glutamate transporter), member 7
3729419	4.93	CA4	carbonic anhydrase IV
3710406	4.93	SHISA6	shisa family member 6
3373630	4.92	APLNR	apelin receptor
3863342	4.92	ATP1A3	ATPase, Na+/K+ transporting, alpha 3 polypeptide
3695315	4.92	CDH16	cadherin 16, KSP-cadherin
3742351	4.92	CHRNE	cholinergic receptor, nicotinic epsilon
2475116	4.92	PLB1	phospholipase B1
3243846	4.92	RET	ret proto-oncogene
2361196	4.92	RXFP4	relaxin/insulin-like family peptide receptor 4
3415046	4.92	SCN8A	sodium channel, voltage gated, type VIII alpha subunit
2971692	4.91	MCM9	minichromosome maintenance 9 homologous recombination repair factor
4054437	4.9	GJB5	gap junction protein beta 5
3195238	4.9	GRIN1	glutamate receptor, ionotropic, N-methyl D-aspartate 1
3643552	4.9	SSTR5	somatostatin receptor 5
3164086	4.89	ADAMTSL1	ADAMTS like 1
2453307	4.89	CD34	CD34 molecule
2405250	4.89	FNDC5	fibronectin type III domain containing 5
3217242	4.89	GABBR2	gamma-aminobutyric acid (GABA) B receptor, 2
2877355	4.89	GFRA3	GDNF family receptor alpha 3
3376317	4.88	CHRM1	cholinergic receptor, muscarinic 1
2793401	4.88	MFAP3L	microfibrillar associated protein 3 like
4007437	4.88	SLC38A5	solute carrier family 38, member 5
3732145	4.87	CACNG1	calcium channel, voltage-dependent, gamma subunit 1
3756319	4.87	CCR7	chemokine (C-C motif) receptor 7
3913775	4.87	CHRNA4	cholinergic receptor, nicotinic alpha 4
3581404	4.87	GPR132	G protein-coupled receptor 132
3652867	4.87	SCNN1G	sodium channel, non voltage gated 1 gamma subunit
2760199	4.87	SLC2A9	solute carrier family 2 (facilitated glucose transporter), member 9
3415988	4.86	AMHR2	anti-Mullerian hormone receptor, type II
2906105	4.86	GLP1R	glucagon-like peptide 1 receptor
3347118	4.86	GRIA4	glutamate receptor, ionotropic, AMPA 4
3656990	4.86	ITGAM	integrin, alpha M (complement component 3 receptor 3 subunit)
3712062	4.86	TRPV2	transient receptor potential cation channel, subfamily V, member 2
4047185	4.85	CCRL2	chemokine (C-C motif) receptor-like 2
3587226	4.85	CHRNA7	cholinergic receptor, nicotinic alpha 7
3767169	4.85	LRRC37A3	leucine rich repeat containing 37, member A3
3395691	4.85	SCN3B	sodium channel, voltage gated, type III beta subunit
3345940	4.84	CNTN5	contactin 5
3399456	4.84	IGSF9B	immunoglobulin superfamily, member 9B
3119213	4.84	LY6K	lymphocyte antigen 6 complex, locus K
3374218	4.84	OR10Q1	olfactory receptor, family 10, subfamily Q, member 1
3318589	4.84	OR52W1	olfactory receptor, family 52, subfamily W, member 1
2452754	4.84	SLC26A9	solute carrier family 26 (anion exchanger), member 9
3260447	4.83	ABCC2	ATP binding cassette subfamily C member 2
2934521	4.83	SLC22A3	solute carrier family 22 (organic cation transporter), member 3
2598145	4.82	ABCA12	ATP binding cassette subfamily A member 12
3722656	4.82	CD300LG	CD300 molecule-like family member g
3707335	4.82	GP1BA	glycoprotein Ib (platelet), alpha polypeptide
3077072	4.82	TRPV6	transient receptor potential cation channel, subfamily V, member 6
3328600	4.82	TSPAN18	tetraspanin 18
2883349	4.81	HAVCR2	hepatitis A virus cellular receptor 2
3798829	4.81	PIEZO2	piezo-type mechanosensitive ion channel component 2
3249369	4.8	LRRTM3	leucine rich repeat transmembrane neuronal 3
3890099	4.8	MC3R	melanocortin 3 receptor
3823007	4.8	OR1I1	olfactory receptor, family 1, subfamily I, member 1
2362323	4.8	OR6K6	olfactory receptor, family 6, subfamily K, member 6
4019784	4.8	TMEM255A	transmembrane protein 255A
3996047	4.79	AVPR2	arginine vasopressin receptor 2
2406783	4.79	CSF3R	colony stimulating factor 3 receptor
3679812	4.79	GRIN2A	glutamate receptor, ionotropic, N-methyl D-aspartate 2A
2886679	4.79	KCNMB1	potassium channel subfamily M regulatory beta subunit 1
3029475	4.79	OR6B1	olfactory receptor, family 6, subfamily B, member 1
3415148	4.78	ACVR1B	activin A receptor type IB
3894727	4.78	SIRPB1	signal-regulatory protein beta 1
3354443	4.78	SLC37A2	solute carrier family 37 (glucose-6-phosphate transporter), member 2
3730601	4.77	ACE	angiotensin I converting enzyme
2409820	4.77	BEST4	bestrophin 4
3376046	4.77	LRRN4CL	LRRN4 C-terminal like
3049700	4.77	PKD1L1	polycystic kidney disease 1 like 1
4051226	4.77	SEMA4D	sema domain, immunoglobulin domain (Ig), transmembrane domain (TM) and short cytoplasmic domain, (semaphorin) 4D
3839642	4.77	SIGLEC7	sialic acid binding Ig-like lectin 7
2617630	4.77	SLC22A13	solute carrier family 22 (organic anion/urate transporter), member 13
3878619	4.77	SLC24A3	solute carrier family 24 (sodium/potassium/calcium exchanger), member 3
3043606	4.77	TRIL	TLR4 interactor with leucine-rich repeats
2634153	4.77	ZPLD1	zona pellucida-like domain containing 1
2362469	4.76	CADM3	cell adhesion molecule 3
3524570	4.76	EFNB2	ephrin-B2
3577360	4.76	PRIMA1	proline rich membrane anchor 1
3853036	4.76	SLC1A6	solute carrier family 1 (high affinity aspartate/glutamate transporter), member 6
3402786	4.75	CD4	CD4 molecule
3869010	4.75	LIM2	lens intrinsic membrane protein 2
3182984	4.75	NIPSNAP3B	nipsnap homolog 3B (C. elegans)
2390158	4.75	OR14K1	olfactory receptor, family 14, subfamily K, member 1
3200762	4.75	SLC24A2	solute carrier family 24 (sodium/potassium/calcium exchanger), member 2
3846695	4.75	TMIGD2	transmembrane and immunoglobulin domain containing 2
3645850	4.74	OR2C1	olfactory receptor, family 2, subfamily C, member 1
3318543	4.74	OR52E5	olfactory receptor, family 52, subfamily E, member 5
3515109	4.74	PCDH8	protocadherin 8
3402757	4.73	LAG3	lymphocyte-activation gene 3
3353859	4.73	OR4D5	olfactory receptor, family 4, subfamily D, member 5
3523978	4.73	SLC10A2	solute carrier family 10 (sodium/bile acid cotransporter), member 2
3922369	4.73	UMODL1	uromodulin-like 1
2445357	4.72	ASTN1	astrotactin 1
3815710	4.72	EFNA2	ephrin-A2
3957790	4.72	PIK3IP1	phosphoinositide-3-kinase interacting protein 1
3911217	4.72	PMEPA1	prostate transmembrane protein, androgen induced 1
2417945	4.72	PTGER3	prostaglandin E receptor 3 (subtype EP3)
2610631	4.72	SLC6A1	solute carrier family 6 (neurotransmitter transporter), member 1
3387010	4.71	GPR83	G protein-coupled receptor 83
2805078	4.7	CDH6	cadherin 6, type 2, K-cadherin (fetal kidney)
2349863	4.7	NTNG1	netrin G1
3135340	4.7	OPRK1	opioid receptor, kappa 1
3224331	4.7	OR1N1	olfactory receptor, family 1, subfamily N, member 1
3819820	4.7	OR2Z1	olfactory receptor, family 2, subfamily Z, member 1
3318553	4.7	OR56A3	olfactory receptor, family 56, subfamily A, member 3
3766549	4.7	SCN4A	sodium channel, voltage gated, type IV alpha subunit
3288518	4.7	VSTM4	V-set and transmembrane domain containing 4
3951583	4.69	XKR3	X-linked Kx blood group related 3
3973556	4.68	CFAP47	cilia and flagella associated protein 47
2587937	4.68	CHRNA1	cholinergic receptor, nicotinic alpha 1
3634682	4.68	CHRNB4	cholinergic receptor, nicotinic beta 4
2362723	4.68	FCRL6	Fc receptor-like 6
3299945	4.68	HTR7	5-hydroxytryptamine (serotonin) receptor 7, adenylate cyclase-coupled
3127745	4.68	TNFRSF10D	tumor necrosis factor receptor superfamily, member 10d, decoy with truncated death domain
2500550	4.67	MERTK	MER proto-oncogene, tyrosine kinase
2610544	4.67	SLC6A11	solute carrier family 6 (neurotransmitter transporter), member 11
2769095	4.66	ERVMER34-1	endogenous retrovirus group MER34, member 1
3445028	4.66	GPR19	G protein-coupled receptor 19
3656223	4.66	ITGAL	integrin alpha L
3326067	4.66	KIAA1549L	KIAA1549-like
2509988	4.66	LYPD6B	LY6/PLAUR domain containing 6B
3332511	4.66	MS4A15	membrane-spanning 4-domains, subfamily A, member 15
2318338	4.66	TAS1R1	taste receptor, type 1, member 1
3948528	4.66	UPK3A	uroplakin 3A
2719656	4.65	CD38	CD38 molecule
3901055	4.65	CD93	CD93 molecule
2711627	4.65	GP5	glycoprotein V (platelet)
3028956	4.65	TAS2R39	taste receptor, type 2, member 39
3757586	4.65	ZNF385C	zinc finger protein 385C
3664664	4.64	CDH5	cadherin 5, type 2 (vascular endothelium)
2677853	4.64	IL17RD	interleukin 17 receptor D
2653673	4.64	KCNMB2	potassium channel subfamily M regulatory beta subunit 2
2399289	4.64	TAS1R2	taste receptor, type 1, member 2
3422144	4.63	LGR5	leucine-rich repeat containing G protein-coupled receptor 5
3395811	4.63	OR10S1	olfactory receptor, family 10, subfamily S, member 1
2731542	4.62	AREG	amphiregulin
3743340	4.62	ASGR2	asialoglycoprotein receptor 2
3286895	4.62	OR13A1	olfactory receptor, family 13, subfamily A, member 1
3652011	4.62	OTOA	otoancorin
2979187	4.62	RAET1G	retinoic acid early transcript 1G
3628498	4.61	CA12	carbonic anhydrase XII
3007960	4.61	CLDN4	claudin 4
3491486	4.61	PCDH17	protocadherin 17
3021377	4.61	PTPRZ1	protein tyrosine phosphatase, receptor-type, Z polypeptide 1
2672075	4.61	XCR1	chemokine (C motif) receptor 1
3821869	4.6	BEST2	bestrophin 2
2375144	4.6	LGR6	leucine-rich repeat containing G protein-coupled receptor 6
3318166	4.6	OR51D1	olfactory receptor, family 51, subfamily D, member 1
2597552	4.59	ERBB4	erb-b2 receptor tyrosine kinase 4
4054427	4.59	GJB4	gap junction protein beta 4
3239437	4.59	GPR158	G protein-coupled receptor 158
3453078	4.59	OR10AD1	olfactory receptor, family 10, subfamily AD, member 1
2390355	4.59	OR2M4	olfactory receptor, family 2, subfamily M, member 4
2849469	4.58	ANKH	ANKH inorganic pyrophosphate transport regulator
3161082	4.58	CD274	CD274 molecule
4044363	4.58	CNR2	cannabinoid receptor 2
3063577	4.58	GJC3	gap junction protein gamma 3
2961647	4.58	HTR1B	5-hydroxytryptamine (serotonin) receptor 1B, G protein-coupled
3971666	4.58	PTCHD1	patched domain containing 1
3869158	4.58	SIGLEC5	sialic acid binding Ig-like lectin 5
2764478	4.57	CCKAR	cholecystokinin A receptor
3734379	4.57	CD300A	CD300a molecule
2705690	4.57	GHSR	growth hormone secretagogue receptor
2899110	4.57	HFE	hemochromatosis
3457872	4.57	MIP	major intrinsic protein of lens fiber
3204987	4.57	OR13J1	olfactory receptor, family 13, subfamily J, member 1
2453006	4.57	PIGR	polymeric immunoglobulin receptor
3330798	4.56	OR5L2	olfactory receptor, family 5, subfamily L, member 2
3339774	4.56	P2RY6	pyrimidinergic receptor P2Y, G-protein coupled, 6
2776837	4.56	SLC10A6	solute carrier family 10 (sodium/bile acid cotransporter), member 6
2806643	4.56	SLC1A3	solute carrier family 1 (glial high affinity glutamate transporter), member 3
3732049	4.55	CACNG5	calcium channel, voltage-dependent, gamma subunit 5
2657808	4.55	CLDN16	claudin 16
2496907	4.55	IL1R2	interleukin 1 receptor, type II
2726234	4.55	NIPAL1	NIPA-like domain containing 1
3414296	4.54	AQP2	aquaporin 2 (collecting duct)
2407314	4.54	EPHA10	EPH receptor A10
3127156	4.54	GFRA2	GDNF family receptor alpha 2
2623308	4.54	GRM2	glutamate receptor, metabotropic 2
3426502	4.54	PLXNC1	plexin C1
2387606	4.53	CHRM3	cholinergic receptor, muscarinic 3
2881187	4.53	CSF1R	colony stimulating factor 1 receptor
3601486	4.53	ISLR2	immunoglobulin superfamily containing leucine-rich repeat 2
3098213	4.53	NPBWR1	neuropeptides B/W receptor 1
3751237	4.53	SEZ6	seizure related 6 homolog (mouse)
4024685	4.53	SLITRK4	SLIT and NTRK-like family, member 4
2800711	4.52	ADCY2	adenylate cyclase 2 (brain)
2707876	4.52	LAMP3	lysosomal-associated membrane protein 3
3444906	4.52	MANSC1	MANSC domain containing 1
2828479	4.52	SLC22A4	solute carrier family 22 (organic cation/zwitterion transporter), member 4
2644619	4.51	ESYT3	extended synaptotagmin-like protein 3
3070873	4.51	GPR37	G protein-coupled receptor 37 (endothelin receptor type B-like)
3779950	4.51	LDLRAD4	low density lipoprotein receptor class A domain containing 4
3177111	4.51	NTRK2	neurotrophic tyrosine kinase, receptor, type 2
3869030	4.51	SIGLEC10	sialic acid binding Ig-like lectin 10
3442812	4.51	SLC2A14	solute carrier family 2 (facilitated glucose transporter), member 14
2953536	4.51	TREML2	triggering receptor expressed on myeloid cells-like 2
3690470	4.5	ABCC11	ATP binding cassette subfamily C member 11
3266253	4.5	KCNK18	potassium channel, two pore domain subfamily K, member 18
2362511	4.49	ACKR1	atypical chemokine receptor 1 (Duffy blood group)
3849488	4.49	OR7D4	olfactory receptor, family 7, subfamily D, member 4
3915569	4.48	CHODL	chondrolectin
2406926	4.48	GRIK3	glutamate receptor, ionotropic, kainate 3
3870824	4.48	LAIR1	leukocyte-associated immunoglobulin-like receptor 1
2559849	4.48	SLC4A5	solute carrier family 4 (sodium bicarbonate cotransporter), member 5
2859565	4.47	ADAMTS6	ADAM metallopeptidase with thrombospondin type 1 motif 6
3666366	4.47	CDH3	cadherin 3, type 1, P-cadherin (placental)
2607757	4.47	CNTN6	contactin 6
3696115	4.47	DPEP3	dipeptidase 3
3995254	4.47	GABRQ	gamma-aminobutyric acid (GABA) A receptor, theta
2356218	4.47	ITGA10	integrin alpha 10
3317824	4.46	ART1	ADP-ribosyltransferase 1
2749222	4.46	GRIA2	glutamate receptor, ionotropic, AMPA 2
2677200	4.46	LRTM1	leucine-rich repeats and transmembrane domains 1
3708515	4.46	TMEM95	transmembrane protein 95
3999148	4.45	GPR143	G protein-coupled receptor 143
2585129	4.44	GALNT3	polypeptide N-acetylgalactosaminyltransferase 3
3959986	4.44	IL2RB	interleukin 2 receptor, beta
2669641	4.44	SCN5A	sodium channel, voltage gated, type V alpha subunit
3887241	4.44	SLC12A5	solute carrier family 12 (potassium/chloride transporter), member 5
3832308	4.43	CATSPERG	catsper channel auxiliary subunit gamma
2560881	4.43	LRRTM4	leucine rich repeat transmembrane neuronal 4
3548849	4.43	SLC24A4	solute carrier family 24 (sodium/potassium/calcium exchanger), member 4
2767932	4.42	GABRG1	gamma-aminobutyric acid (GABA) A receptor, gamma 1
3839489	4.42	GPR32	G protein-coupled receptor 32
2878987	4.42	PCDH12	protocadherin 12
3889419	4.42	TSHZ2	teashirt zinc finger homeobox 2
2360677	4.41	EFNA1	ephrin-A1
2618620	4.41	ENTPD3	ectonucleoside triphosphate diphosphohydrolase 3
2882026	4.41	FAT2	FAT atypical cadherin 2
3246182	4.41	SLC18A3	solute carrier family 18 (vesicular acetylcholine transporter), member 3
3791254	4.41	TNFRSF11A	tumor necrosis factor receptor superfamily, member 11a, NFKB activator
3338293	4.39	ANO1	anoctamin 1, calcium activated chloride channel
3506648	4.39	GPR12	G protein-coupled receptor 12
3224333	4.39	OR1L8	olfactory receptor, family 1, subfamily L, member 8
2617659	4.39	SLC22A14	solute carrier family 22, member 14
2815220	4.39	TMEM171	transmembrane protein 171
3400730	4.38	CACNA1C	calcium channel, voltage-dependent, L type, alpha 1C subunit
3891664	4.38	CDH26	cadherin 26
3622176	4.38	DUOX2	dual oxidase 2
2504743	4.38	GPR17	G protein-coupled receptor 17
3790982	4.37	CDH20	cadherin 20, type 2
3743551	4.37	CLDN7	claudin 7
2603320	4.37	GPR55	G protein-coupled receptor 55
2877597	4.37	LRRTM2	leucine rich repeat transmembrane neuronal 2
3841881	4.37	NCR1	natural cytotoxicity triggering receptor 1
3360724	4.37	OR56A1	olfactory receptor, family 56, subfamily A, member 1
3645764	4.36	OR1F1	olfactory receptor, family 1, subfamily F, member 1
3332003	4.35	OR5A1	olfactory receptor, family 5, subfamily A, member 1
2585400	4.35	SCN9A	sodium channel, voltage gated, type IX alpha subunit
2362746	4.35	SLAMF8	SLAM family member 8
3834502	4.34	CD79A	CD79a molecule, immunoglobulin-associated alpha
3603436	4.34	CHRNA5	cholinergic receptor, nicotinic alpha 5
3980867	4.34	GJB1	gap junction protein beta 1
3318349	4.34	OR51I2	olfactory receptor, family 51, subfamily I, member 2
3318141	4.34	OR52M1	olfactory receptor, family 52, subfamily M, member 1
3204680	4.34	SIT1	signaling threshold regulating transmembrane adaptor 1
3093526	4.34	UNC5D	unc-5 netrin receptor D
3722195	4.32	AOC3	amine oxidase, copper containing 3
3669171	4.32	CNTNAP4	contactin associated protein-like 4
3653516	4.32	SLC5A11	solute carrier family 5 (sodium/inositol cotransporter), member 11
2362180	4.31	CD1A	CD1a molecule
3205019	4.31	OR2S2	olfactory receptor, family 2, subfamily S, member 2 (gene/pseudogene)
3837889	4.31	SPACA4	sperm acrosome associated 4
2642995	4.31	TMEM108	transmembrane protein 108
3393536	4.31	TMPRSS13	transmembrane protease, serine 13
3391724	4.31	TMPRSS5	transmembrane protease, serine 5
2768197	4.3	CORIN	corin, serine peptidase
2947842	4.3	MAS1L	MAS1 proto-oncogene like, G protein-coupled receptor
3786694	4.3	SLC14A2	solute carrier family 14 (urea transporter), member 2
3990460	4.3	XPNPEP2	X-prolyl aminopeptidase (aminopeptidase P) 2, membrane-bound
3396249	4.29	HEPACAM	hepatic and glial cell adhesion molecule
2414958	4.29	TACSTD2	tumor-associated calcium signal transducer 2
3822849	4.28	CLEC17A	C-type lectin domain family 17, member A
3973839	4.28	CYBB	cytochrome b-245, beta polypeptide
2900750	4.28	OR2J3	olfactory receptor, family 2, subfamily J, member 3
3555850	4.28	OR5AU1	olfactory receptor, family 5, subfamily AU, member 1
2407786	4.27	RHBDL2	rhomboid, veinlet-like 2 (Drosophila)
3385951	4.26	NOX4	NADPH oxidase 4
3373503	4.26	OR5AP2	olfactory receptor, family 5, subfamily AP, member 2
3373383	4.26	OR5T2	olfactory receptor, family 5, subfamily T, member 2
3126694	4.26	SLC18A1	solute carrier family 18 (vesicular monoamine transporter), member 1
3605958	4.26	SLC28A1	solute carrier family 28 (concentrative nucleoside transporter), member 1
2591367	4.25	CALCRL	calcitonin receptor like receptor
3061181	4.25	ERVW-1	endogenous retrovirus group W, member 1
3318967	4.25	OR10A2	olfactory receptor, family 10, subfamily A, member 2
3868257	4.25	SIGLEC11	sialic acid binding Ig-like lectin 11
3744620	4.24	MFSD6L	major facilitator superfamily domain containing 6-like
3661766	4.24	SLC6A2	solute carrier family 6 (neurotransmitter transporter), member 2
3255311	4.23	CDHR1	cadherin-related family member 1
3751794	4.23	SLC6A4	solute carrier family 6 (neurotransmitter transporter), member 4
3519624	4.23	SLITRK1	SLIT and NTRK-like family, member 1
2466554	4.23	TPO	thyroid peroxidase
3863669	4.22	CEACAM1	carcinoembryonic antigen-related cell adhesion molecule 1 (biliary glycoprotein)
2731513	4.22	EREG	epiregulin
3914346	4.22	NPBWR2	neuropeptides B/W receptor 2
3896257	4.22	PROKR2	prokineticin receptor 2
2976041	4.21	IL20RA	interleukin 20 receptor, alpha
3993853	4.21	SLITRK2	SLIT and NTRK-like family, member 2
4011096	4.2	EDA2R	ectodysplasin A2 receptor
3830417	4.2	FFAR3	free fatty acid receptor 3
2949299	4.2	LY6G6C	lymphocyte antigen 6 complex, locus G6C
3365738	4.2	MRGPRX2	MAS-related GPR, member X2
3299661	4.2	SLC16A12	solute carrier family 16, member 12
3044283	4.19	CRHR2	corticotropin releasing hormone receptor 2
3351166	4.19	IL10RA	interleukin 10 receptor, alpha
2363248	4.19	LY9	lymphocyte antigen 9
3331027	4.19	OR5AR1	olfactory receptor, family 5, subfamily AR, member 1 (gene/pseudogene)
2560524	4.19	TACR1	tachykinin receptor 1
3417767	4.18	GPR182	G protein-coupled receptor 182
3834837	4.18	MEGF8	multiple EGF-like-domains 8
3374213	4.18	OR1S2	olfactory receptor, family 1, subfamily S, member 2
2439508	4.18	OR6N2	olfactory receptor, family 6, subfamily N, member 2
3222144	4.18	TNFSF8	tumor necrosis factor (ligand) superfamily, member 8
3588037	4.17	CHRM5	cholinergic receptor, muscarinic 5
3268865	4.17	GPR26	G protein-coupled receptor 26
2317686	4.16	AJAP1	adherens junctions associated protein 1
2882325	4.16	NMUR2	neuromedin U receptor 2
3535780	4.16	PTGER2	prostaglandin E receptor 2
3858757	4.16	SLC7A9	solute carrier family 7 (amino acid transporter light chain, bo,+ system), member 9
3410056	4.16	TSPAN11	tetraspanin 11
2850676	4.15	CDH18	cadherin 18, type 2
2442493	4.15	GPA33	glycoprotein A33 (transmembrane)
3819870	4.15	OR1M1	olfactory receptor, family 1, subfamily M, member 1
2662473	4.15	PRRT3	proline-rich transmembrane protein 3
3397877	4.14	ARHGAP32	Rho GTPase activating protein 32
3086774	4.14	KIAA1456	KIAA1456
3853566	4.14	OR10H1	olfactory receptor, family 10, subfamily H, member 1
2439345	4.14	OR6Y1	olfactory receptor, family 6, subfamily Y, member 1
2659393	4.14	SLC51A	solute carrier family 51, alpha subunit
3500787	4.14	TNFSF13B	tumor necrosis factor (ligand) superfamily, member 13b
2533999	4.13	ACKR3	atypical chemokine receptor 3
3770361	4.13	CD300LF	CD300 molecule-like family member f
3475764	4.13	HCAR1	hydroxycarboxylic acid receptor 1
3125571	4.13	MSR1	macrophage scavenger receptor 1
2606634	4.13	OR6B3	olfactory receptor, family 6, subfamily B, member 3
3504193	4.12	GJB2	gap junction protein beta 2
3445156	4.11	GSG1	germ cell associated 1
2730933	4.11	NPFFR2	neuropeptide FF receptor 2
2390253	4.11	OR2L8	olfactory receptor, family 2, subfamily L, member 8 (gene/pseudogene)
3139580	4.11	SLCO5A1	solute carrier organic anion transporter family, member 5A1
3018011	4.1	CDHR3	cadherin-related family member 3
2902089	4.1	DPCR1	diffuse panbronchiolitis critical region 1
3184710	4.1	MUSK	muscle, skeletal, receptor tyrosine kinase
2909540	4.1	OPN5	opsin 5
3369366	4.1	SLC1A2	solute carrier family 1 (glial high affinity glutamate transporter), member 2
2952198	4.1	TMEM217	transmembrane protein 217
2620736	4.09	CCR9	chemokine (C-C motif) receptor 9
3710108	4.09	GLP2R	glucagon-like peptide 2 receptor
2692883	4.09	MUC13	mucin 13, cell surface associated
2900940	4.08	MOG	myelin oligodendrocyte glycoprotein
2584134	4.07	FAP	fibroblast activation protein alpha
2440354	4.06	CD48	CD48 molecule
3133434	4.06	CHRNA6	cholinergic receptor, nicotinic alpha 6
2869880	4.06	EFNA5	ephrin-A5
2577856	4.06	LCT	lactase
2778440	4.06	UNC5C	unc-5 netrin receptor C
3610958	4.05	IGF1R	insulin-like growth factor 1 receptor
3303407	4.05	PKD2L1	polycystic kidney disease 2-like 1
3323491	4.05	SLC6A5	solute carrier family 6 (neurotransmitter transporter), member 5
2827299	4.04	MEGF10	multiple EGF-like-domains 10
3637818	4.04	NTRK3	neurotrophic tyrosine kinase, receptor, type 3
3527342	4.04	OR4K17	olfactory receptor, family 4, subfamily K, member 17
3570266	4.04	SLC10A1	solute carrier family 10 (sodium/bile acid cotransporter), member 1
3121751	4.03	CSMD1	CUB and Sushi multiple domains 1
3033127	4.03	HTR5A	5-hydroxytryptamine (serotonin) receptor 5A, G protein-coupled
2475042	4.03	PLB1	phospholipase B1
3683502	4.02	GP2	glycoprotein 2 (zymogen granule membrane)
3734355	4.02	GPRC5C	G protein-coupled receptor, class C, group 5, member C
2603395	4.02	HTR2B	5-hydroxytryptamine (serotonin) receptor 2B, G protein-coupled
2403446	4.02	PTAFR	platelet-activating factor receptor
3352847	4.02	TECTA	tectorin alpha
3887302	4.01	CD40	CD40 molecule, TNF receptor superfamily member 5
2569649	4.01	EDAR	ectodysplasin A receptor
3143660	4.01	MMP16	matrix metallopeptidase 16 (membrane-inserted)
4011620	4	P2RY4	pyrimidinergic receptor P2Y, G-protein coupled, 4
3414969	4	SCN8A	sodium channel, voltage gated, type VIII alpha subunit
3222128	4	TNFSF15	tumor necrosis factor (ligand) superfamily, member 15
2941757	3.99	ERVFRD-1	endogenous retrovirus group FRD, member 1
4054414	3.99	GJB3	gap junction protein beta 3
2916067	3.99	HTR1E	5-hydroxytryptamine (serotonin) receptor 1E, G protein-coupled
3059942	3.99	KIAA1324L	KIAA1324-like
2900910	3.99	OR2H2	olfactory receptor, family 2, subfamily H, member 2
2636483	3.99	SIDT1	SID1 transmembrane family, member 1
3258625	3.97	FFAR4	free fatty acid receptor 4
2900143	3.97	OR2B6	olfactory receptor, family 2, subfamily B, member 6
2390322	3.97	OR2M5	olfactory receptor, family 2, subfamily M, member 5
3360325	3.97	OR51A4	olfactory receptor, family 51, subfamily A, member 4
3395807	3.97	OR6T1	olfactory receptor, family 6, subfamily T, member 1
2362270	3.96	OR10K1	olfactory receptor, family 10, subfamily K, member 1
3182894	3.96	OR13F1	olfactory receptor, family 13, subfamily F, member 1
3863723	3.95	CEACAM8	carcinoembryonic antigen-related cell adhesion molecule 8
2794584	3.95	GPM6A	glycoprotein M6A
4000155	3.95	GPM6B	glycoprotein M6B
3870798	3.95	LILRA4	leukocyte immunoglobulin-like receptor, subfamily A (with TM domain), member 4
3360308	3.95	OR51G2	olfactory receptor, family 51, subfamily G, member 2
2832431	3.95	PCDHB11	protocadherin beta 11
3592755	3.95	SEMA6D	sema domain, transmembrane domain (TM), and cytoplasmic domain, (semaphorin) 6D
2439001	3.94	FCRL3	Fc receptor-like 3
3585223	3.94	GABRA5	gamma-aminobutyric acid (GABA) A receptor, alpha 5
2596257	3.94	GPR1	G protein-coupled receptor 1
2880552	3.94	HTR4	5-hydroxytryptamine (serotonin) receptor 4, G protein-coupled
3768412	3.94	SLC16A6	solute carrier family 16, member 6
2356100	3.93	HFE2	hemochromatosis type 2 (juvenile)
2686602	3.93	IMPG2	interphotoreceptor matrix proteoglycan 2
2465902	3.93	OR2M7	olfactory receptor, family 2, subfamily M, member 7
2360186	3.92	AQP10	aquaporin 10
2362950	3.92	ATP1A4	ATPase, Na+/K+ transporting, alpha 4 polypeptide
3366903	3.92	MUC15	mucin 15, cell surface associated
3262715	3.92	SORCS3	sortilin-related VPS10 domain containing receptor 3
2638824	3.91	CASR	calcium-sensing receptor
3029434	3.91	OR2F2	olfactory receptor, family 2, subfamily F, member 2
2881950	3.91	SLC36A2	solute carrier family 36 (proton/amino acid symporter), member 2
3445723	3.9	ART4	ADP-ribosyltransferase 4 (Dombrock blood group)
2903189	3.9	HLA-DRA	major histocompatibility complex, class II, DR alpha
3318976	3.9	OR10A4	olfactory receptor, family 10, subfamily A, member 4
2390243	3.9	OR2L13	olfactory receptor, family 2, subfamily L, member 13
2647315	3.9	TM4SF4	transmembrane 4 L six family member 4
3475915	3.89	ABCB9	ATP binding cassette subfamily B member 9
3979762	3.89	HEPH	hephaestin
3535752	3.89	PTGDR	prostaglandin D2 receptor (DP)
2721959	3.89	SLC34A2	solute carrier family 34 (type II sodium/phosphate cotransporter), member 2
3907151	3.88	KCNS1	potassium voltage-gated channel, modifier subfamily S, member 1
3071459	3.88	LRRC4	leucine rich repeat containing 4
2443450	3.88	SELL	selectin L
2852712	3.88	SLC45A2	solute carrier family 45, member 2
2420615	3.87	LPAR3	lysophosphatidic acid receptor 3
3399004	3.87	OPCML	opioid binding protein/cell adhesion molecule-like
3089816	3.87	TNFRSF10C	tumor necrosis factor receptor superfamily, member 10c, decoy without an intracellular domain
2440784	3.86	MPZ	myelin protein zero
3823390	3.86	OR10H3	olfactory receptor, family 10, subfamily H, member 3
3268895	3.85	GPR26	G protein-coupled receptor 26
3768703	3.84	ABCA9	ATP binding cassette subfamily A member 9
2550755	3.83	ABCG5	ATP binding cassette subfamily G member 5
3119289	3.83	GML	glycosylphosphatidylinositol anchored molecule like
3533811	3.83	LRFN5	leucine rich repeat and fibronectin type III domain containing 5
3382175	3.83	OR2AT4	olfactory receptor, family 2, subfamily AT, member 4
2443417	3.83	SELP	selectin P (granule membrane protein 140kDa, antigen CD62)
3835060	3.83	TEX101	testis expressed 101
2469575	3.82	ATP6V1C2	ATPase, H+ transporting, lysosomal 42kDa, V1 subunit C2
3854454	3.82	BST2	bone marrow stromal cell antigen 2
2353749	3.82	CD101	CD101 molecule
2440385	3.81	CD244	CD244 molecule, natural killer cell receptor 2B4
2888010	3.81	DRD1	dopamine receptor D1
2655338	3.81	HTR3E	5-hydroxytryptamine (serotonin) receptor 3E, ionotropic
3404030	3.81	KLRG1	killer cell lectin-like receptor subfamily G, member 1
3332032	3.81	OR4D9	olfactory receptor, family 4, subfamily D, member 9
2705030	3.81	SLC7A14	solute carrier family 7, member 14
3417249	3.8	ERBB3	erb-b2 receptor tyrosine kinase 3
3869237	3.8	FPR1	formyl peptide receptor 1
3798778	3.8	PIEZO2	piezo-type mechanosensitive ion channel component 2
2953501	3.8	TREM2	triggering receptor expressed on myeloid cells 2
3840666	3.8	VN1R2	vomeronasal 1 receptor 2
3872584	3.79	C19orf18	chromosome 19 open reading frame 18
3301782	3.79	OPALIN	oligodendrocytic myelin paranodal and inner loop protein
2900812	3.79	OR12D2	olfactory receptor, family 12, subfamily D, member 2 (gene/pseudogene)
3175274	3.79	PCSK5	proprotein convertase subtilisin/kexin type 5
3874775	3.79	PRND	prion protein 2 (dublet)
2497974	3.78	GPR45	G protein-coupled receptor 45
2950145	3.78	HLA-DOB	major histocompatibility complex, class II, DO beta
3353879	3.78	OR10G8	olfactory receptor, family 10, subfamily G, member 8
3849469	3.78	OR7G3	olfactory receptor, family 7, subfamily G, member 3
3076882	3.78	TAS2R38	taste receptor, type 2, member 38
2748346	3.78	TLR2	toll-like receptor 2
2637831	3.78	UPK1B	uroplakin 1B
3393720	3.77	MPZL2	myelin protein zero-like 2
3318354	3.77	OR52D1	olfactory receptor, family 52, subfamily D, member 1
3963990	3.77	PKDREJ	polycystin (PKD) family receptor for egg jelly
3127775	3.77	TNFRSF10A	tumor necrosis factor receptor superfamily, member 10a
3980380	3.76	EDA	ectodysplasin A
3994964	3.76	GPR50	G protein-coupled receptor 50
2977122	3.76	NMBR	neuromedin B receptor
3318329	3.76	OR51M1	olfactory receptor, family 51, subfamily M, member 1
3395964	3.76	OR8B8	olfactory receptor, family 8, subfamily B, member 8
2669732	3.76	SCN10A	sodium channel, voltage gated, type X alpha subunit
3768791	3.75	ABCA6	ATP binding cassette subfamily A member 6
2851511	3.75	CDH9	cadherin 9, type 2 (T1-cadherin)
2859387	3.75	HTR1A	5-hydroxytryptamine (serotonin) receptor 1A, G protein-coupled
3318961	3.75	OR10A5	olfactory receptor, family 10, subfamily A, member 5
3741305	3.75	OR1D2	olfactory receptor, family 1, subfamily D, member 2
3392332	3.74	CADM1	cell adhesion molecule 1
3932524	3.74	DSCAM	Down syndrome cell adhesion molecule
2964092	3.74	GABRR1	gamma-aminobutyric acid (GABA) A receptor, rho 1
2365086	3.74	LRRC52	leucine rich repeat containing 52
3360396	3.74	OR51V1	olfactory receptor, family 51, subfamily V, member 1
3395899	3.73	OR8D2	olfactory receptor, family 8, subfamily D, member 2 (gene/pseudogene)
3441542	3.72	ANO2	anoctamin 2, calcium activated chloride channel
2691112	3.72	GPR156	G protein-coupled receptor 156
3475794	3.72	HCAR3	hydroxycarboxylic acid receptor 3
2704504	3.72	MECOM	MDS1 and EVI1 complex locus
2926131	3.72	TAAR9	trace amine associated receptor 9 (gene/pseudogene)
2773545	3.71	BTC	betacellulin
3416834	3.71	OR6C3	olfactory receptor, family 6, subfamily C, member 3
3395765	3.71	OR6X1	olfactory receptor, family 6, subfamily X, member 1
4020655	3.71	TENM1	teneurin transmembrane protein 1
2974635	3.71	VNN2	vanin 2
3690388	3.7	ABCC12	ATP binding cassette subfamily C member 12
2373564	3.7	CRB1	crumbs family member 1, photoreceptor morphogenesis associated
3456688	3.7	GPR84	G protein-coupled receptor 84
3706593	3.7	OR1A1	olfactory receptor, family 1, subfamily A, member 1
3224336	3.7	OR1B1	olfactory receptor, family 1, subfamily B, member 1 (gene/pseudogene)
3318383	3.7	OR52B6	olfactory receptor, family 52, subfamily B, member 6
3429159	3.7	STAB2	stabilin 2
2974542	3.7	TAAR5	trace amine associated receptor 5
3958157	3.69	SLC5A4	solute carrier family 5 (glucose activated ion channel), member 4
2844888	3.68	BTNL3	butyrophilin-like 3
2362201	3.68	CD1C	CD1c molecule
2724723	3.68	CHRNA9	cholinergic receptor, nicotinic alpha 9
3870692	3.68	LILRB5	leukocyte immunoglobulin-like receptor, subfamily B (with TM and ITIM domains), member 5
2731928	3.67	ART3	ADP-ribosyltransferase 3
3646613	3.67	RBFOX1	RNA binding protein, fox-1 homolog (C. elegans) 1
3160658	3.67	SLC1A1	solute carrier family 1 (neuronal/epithelial high affinity glutamate transporter, system Xag), member 1
3060332	3.67	STEAP4	STEAP family member 4
3470193	3.66	CMKLR1	chemerin chemokine-like receptor 1
2578028	3.66	CXCR4	chemokine (C-X-C motif) receptor 4
2840393	3.66	GABRP	gamma-aminobutyric acid (GABA) A receptor, pi
3360277	3.66	OR52R1	olfactory receptor, family 52, subfamily R, member 1 (gene/pseudogene)
3354095	3.66	OR8A1	olfactory receptor, family 8, subfamily A, member 1
3593014	3.66	SLC24A5	solute carrier family 24 (sodium/potassium/calcium exchanger), member 5
3459722	3.65	AVPR1A	arginine vasopressin receptor 1A
3393744	3.65	CD3D	CD3d molecule, delta (CD3-TCR complex)
2523855	3.65	CTLA4	cytotoxic T-lymphocyte-associated protein 4
2991860	3.65	ITGB8	integrin beta 8
2390135	3.65	OR2G2	olfactory receptor, family 2, subfamily G, member 2
3461883	3.65	PTPRR	protein tyrosine phosphatase, receptor type, R
2718259	3.64	DRD5	dopamine receptor D5
3339382	3.64	FOLR2	folate receptor 2 (fetal)
3839920	3.64	FPR3	formyl peptide receptor 3
3585272	3.64	GABRG3	gamma-aminobutyric acid (GABA) A receptor, gamma 3
3972657	3.64	IL1RAPL1	interleukin 1 receptor accessory protein-like 1
3570373	3.64	SLC8A3	solute carrier family 8 (sodium/calcium exchanger), member 3
3841545	3.63	LILRA1	leukocyte immunoglobulin-like receptor, subfamily A (with TM domain), member 1
3374224	3.63	OR10W1	olfactory receptor, family 10, subfamily W, member 1
3361238	3.63	OR2D2	olfactory receptor, family 2, subfamily D, member 2
2974935	3.63	SLC2A12	solute carrier family 2 (facilitated glucose transporter), member 12
3527785	3.63	SLC39A2	solute carrier family 39 (zinc transporter), member 2
3980614	3.62	GDPD2	glycerophosphodiester phosphodiesterase domain containing 2
3266279	3.62	SLC18A2	solute carrier family 18 (vesicular monoamine transporter), member 2
4045381	3.62	TLR5	toll-like receptor 5
2609061	3.61	GRM7	glutamate receptor, metabotropic 7
2932219	3.61	OPRM1	opioid receptor, mu 1
3318244	3.61	OR51T1	olfactory receptor, family 51, subfamily T, member 1
3162486	3.61	TYRP1	tyrosinase-related protein 1
3527377	3.6	OR11H6	olfactory receptor, family 11, subfamily H, member 6
3376433	3.6	SLC22A25	solute carrier family 22, member 25
3943234	3.6	SLC5A1	solute carrier family 5 (sodium/glucose cotransporter), member 1
2439652	3.59	OR10J3	olfactory receptor, family 10, subfamily J, member 3
3416773	3.59	OR9K2	olfactory receptor, family 9, subfamily K, member 2
3959787	3.58	CACNG2	calcium channel, voltage-dependent, gamma subunit 2
2362230	3.58	CD1E	CD1e molecule
2689378	3.58	DRD3	dopamine receptor D3
3360675	3.58	OR52N1	olfactory receptor, family 52, subfamily N, member 1
3331994	3.58	OR5AN1	olfactory receptor, family 5, subfamily AN, member 1
2353669	3.57	CD2	CD2 molecule
2796224	3.57	ENPP6	ectonucleotide pyrophosphatase/phosphodiesterase 6
2367599	3.57	FASLG	Fas ligand (TNF superfamily, member 6)
3445108	3.57	GPRC5D	G protein-coupled receptor, class C, group 5, member D
2945598	3.57	KIAA0319	KIAA0319
2748723	3.57	NPY2R	neuropeptide Y receptor Y2
3360702	3.57	OR52L1	olfactory receptor, family 52, subfamily L, member 1
3330786	3.57	OR5L1	olfactory receptor, family 5, subfamily L, member 1 (gene/pseudogene)
3467949	3.57	SLC5A8	solute carrier family 5 (sodium/monocarboxylate cotransporter), member 8
3110608	3.56	DCSTAMP	dendrocyte expressed seven transmembrane protein
3324321	3.55	ANO3	anoctamin 3
2440295	3.55	CD84	CD84 molecule
3351675	3.55	CXCR5	chemokine (C-X-C motif) receptor 5
3279313	3.55	ITGA8	integrin alpha 8
3728571	3.55	OR4D1	olfactory receptor, family 4, subfamily D, member 1
2523801	3.54	CD28	CD28 molecule
2351572	3.54	CD53	CD53 molecule
3016070	3.54	MUC17	mucin 17, cell surface associated
3783435	3.53	DSG4	desmoglein 4
3445326	3.53	GRIN2B	glutamate receptor, ionotropic, N-methyl D-aspartate 2B
2655325	3.53	HTR3C	5-hydroxytryptamine (serotonin) receptor 3C, ionotropic
3915936	3.53	NCAM2	neural cell adhesion molecule 2
3360719	3.53	OR56A4	olfactory receptor, family 56, subfamily A, member 4
2783978	3.53	QRFPR	pyroglutamylated RFamide peptide receptor
2740507	3.53	UGT8	UDP glycosyltransferase 8
2586038	3.52	LRP2	LDL receptor related protein 2
2443476	3.52	SELE	selectin E
2444283	3.52	TNFSF4	tumor necrosis factor (ligand) superfamily, member 4
3442706	3.51	CD163	CD163 molecule
2439917	3.51	SLAMF9	SLAM family member 9
3969115	3.51	TLR8	toll-like receptor 8
2794454	3.5	GLRA3	glycine receptor alpha 3
3996142	3.5	OPN1LW	opsin 1 (cone pigments), long-wave-sensitive
3929458	3.49	C21orf62	chromosome 21 open reading frame 62
3986346	3.49	CLDN2	claudin 2
3555590	3.49	OR6S1	olfactory receptor, family 6, subfamily S, member 1
3028001	3.49	OR9A4	olfactory receptor, family 9, subfamily A, member 4
2497028	3.48	IL1RL2	interleukin 1 receptor-like 2
2644202	3.48	IL20RB	interleukin 20 receptor beta
3982534	3.48	LPAR4	lysophosphatidic acid receptor 4
3812922	3.48	NETO1	neuropilin (NRP) and tolloid (TLL)-like 1
3330961	3.48	OR8J1	olfactory receptor, family 8, subfamily J, member 1
2479698	3.48	SLC3A1	solute carrier family 3 (amino acid transporter heavy chain), member 1
4011743	3.48	SLC7A3	solute carrier family 7 (cationic amino acid transporter, y+ system), member 3
3788944	3.46	DYNAP	dynactin associated protein
3275729	3.46	IL2RA	interleukin 2 receptor, alpha
3071860	3.46	OPN1SW	opsin 1 (cone pigments), short-wave-sensitive
3839741	3.46	SIGLECL1	SIGLEC family like 1
2982524	3.46	SLC22A2	solute carrier family 22 (organic cation transporter), member 2
3333831	3.46	SLC22A9	solute carrier family 22 (organic anion transporter), member 9
3165825	3.46	TEK	TEK tyrosine kinase, endothelial
3075531	3.46	ZC3HAV1L	zinc finger CCCH-type, antiviral 1-like
3442941	3.45	C3AR1	complement component 3a receptor 1
3218151	3.45	GRIN3A	glutamate receptor, ionotropic, N-methyl-D-aspartate 3A
3523318	3.45	NALCN	sodium leak channel, non selective
3029447	3.45	OR2F1	olfactory receptor, family 2, subfamily F, member 1 (gene/pseudogene)
3075331	3.45	SVOPL	SVOP-like
3812385	3.44	CD226	CD226 molecule
3029900	3.44	CNTNAP2	contactin associated protein-like 2
2620773	3.44	CXCR6	chemokine (C-X-C motif) receptor 6
3310041	3.44	FGFR2	fibroblast growth factor receptor 2
2727587	3.44	KIT	v-kit Hardy-Zuckerman 4 feline sarcoma viral oncogene homolog
2584957	3.44	SCN3A	sodium channel, voltage gated, type III alpha subunit
3849459	3.43	OR7G2	olfactory receptor, family 7, subfamily G, member 2
3894765	3.43	SIRPG	signal-regulatory protein gamma
3870449	3.43	VSTM1	V-set and transmembrane domain containing 1
2672096	3.42	CCR1	chemokine (C-C motif) receptor 1
2633191	3.42	GPR15	G protein-coupled receptor 15
2985026	3.42	GPR31	G protein-coupled receptor 31
3330145	3.42	OR4S1	olfactory receptor, family 4, subfamily S, member 1
2525353	3.42	PTH2R	parathyroid hormone 2 receptor
3452417	3.42	SLC38A4	solute carrier family 38, member 4
2705014	3.42	SLC7A14	solute carrier family 7, member 14
3305801	3.42	SORCS1	sortilin-related VPS10 domain containing receptor 1
2429371	3.42	TSPAN2	tetraspanin 2
3653266	3.41	CACNG3	calcium channel, voltage-dependent, gamma subunit 3
3863214	3.41	CEACAM7	carcinoembryonic antigen-related cell adhesion molecule 7
3475782	3.41	HCAR2	hydroxycarboxylic acid receptor 2
3365682	3.41	MRGPRX1	MAS-related GPR, member X1
2996753	3.41	NPSR1	neuropeptide S receptor 1
3555206	3.41	OR4K13	olfactory receptor, family 4, subfamily K, member 13
3331686	3.41	OR9Q2	olfactory receptor, family 9, subfamily Q, member 2
2899473	3.4	BTN1A1	butyrophilin, subfamily 1, member A1
3362826	3.4	LYVE1	lymphatic vessel endothelial hyaluronan receptor 1
2974576	3.4	TAAR1	trace amine associated receptor 1
2953570	3.4	TREM1	triggering receptor expressed on myeloid cells 1
3404436	3.39	CLEC2D	C-type lectin domain family 2, member D
3593931	3.39	GLDN	gliomedin
2810055	3.39	IL31RA	interleukin 31 receptor A
3360587	3.39	OR52H1	olfactory receptor, family 52, subfamily H, member 1
3373463	3.39	OR5M11	olfactory receptor, family 5, subfamily M, member 11
2729821	3.39	TMPRSS11E	transmembrane protease, serine 11E
4022370	3.38	GPC4	glypican 4
3071063	3.38	GRM8	glutamate receptor, metabotropic 8
3318266	3.38	OR52J3	olfactory receptor, family 52, subfamily J, member 3
2832439	3.38	PCDHB12	protocadherin beta 12
3446919	3.37	ABCC9	ATP binding cassette subfamily C member 9
3370269	3.37	LRRC4C	leucine rich repeat containing 4C
3871459	3.37	SHISA7	shisa family member 7
3955483	3.37	TMEM211	transmembrane protein 211
2655308	3.36	HTR3D	5-hydroxytryptamine (serotonin) receptor 3D, ionotropic
2955932	3.35	ADGRF1	adhesion G protein-coupled receptor F1
3128817	3.35	ADRA1A	adrenoceptor alpha 1A
2503929	3.35	CNTNAP5	contactin associated protein-like 5
2701033	3.35	P2RY14	purinergic receptor P2Y, G-protein coupled, 14
2956904	3.35	PKHD1	polycystic kidney and hepatic disease 1 (autosomal recessive)
3786868	3.35	SLC14A1	solute carrier family 14 (urea transporter), member 1 (Kidd blood group)
3592304	3.35	SLC28A2	solute carrier family 28 (concentrative nucleoside transporter), member 2
2390142	3.34	OR2G3	olfactory receptor, family 2, subfamily G, member 3
2602403	3.34	SLC19A3	solute carrier family 19 (thiamine transporter), member 3
3818091	3.33	CATSPERD	catsper channel auxiliary subunit delta
3788560	3.33	DCC	DCC netrin 1 receptor
3015519	3.33	PILRA	paired immunoglobin-like type 2 receptor alpha
2340961	3.32	IL12RB2	interleukin 12 receptor, beta 2
2624565	3.32	IL17RB	interleukin 17 receptor B
2934274	3.32	MAS1	MAS1 proto-oncogene, G protein-coupled receptor
2616131	3.31	CCR4	chemokine (C-C motif) receptor 4
2932593	3.31	CLDN20	claudin 20
2838416	3.31	GABRA1	gamma-aminobutyric acid (GABA) A receptor, alpha 1
2427619	3.31	KCNA3	potassium channel, voltage gated shaker related subfamily A, member 3
3710505	3.31	SHISA6	shisa family member 6
3444329	3.3	TAS2R10	taste receptor, type 2, member 10
3198346	3.29	PTPRD	protein tyrosine phosphatase, receptor type, D
4000641	3.29	TMEM27	transmembrane protein 27
3188186	3.28	OR1Q1	olfactory receptor, family 1, subfamily Q, member 1
2439350	3.28	OR6N1	olfactory receptor, family 6, subfamily N, member 1
2627251	3.28	SYNPR	synaptoporin
2926147	3.28	TAAR6	trace amine associated receptor 6
3802924	3.27	DSC3	desmocollin 3
2924081	3.27	NKAIN2	Na+/K+ transporting ATPase interacting 2
3527340	3.27	OR4L1	olfactory receptor, family 4, subfamily L, member 1
3841862	3.26	FCAR	Fc fragment of IgA receptor
2440943	3.26	FCGR3A	Fc fragment of IgG, low affinity IIIa, receptor (CD16a)
3484895	3.26	KL	klotho
3998247	3.26	NLGN4X	neuroligin 4, X-linked
3741311	3.26	OR1G1	olfactory receptor, family 1, subfamily G, member 1
3318577	3.26	OR56B4	olfactory receptor, family 56, subfamily B, member 4
2872047	3.26	SEMA6A	sema domain, transmembrane domain (TM), and cytoplasmic domain, (semaphorin) 6A
3770328	3.25	CD300LD	CD300 molecule-like family member d
2746591	3.25	EDNRA	endothelin receptor type A
3417788	3.25	GPR182	G protein-coupled receptor 182
2648677	3.25	MME	membrane metallo-endopeptidase
3393704	3.25	MPZL3	myelin protein zero-like 3
2669803	3.25	SCN11A	sodium channel, voltage gated, type XI alpha subunit
3593065	3.25	SLC12A1	solute carrier family 12 (sodium/potassium/chloride transporter), member 1
2462693	3.25	ZP4	zona pellucida glycoprotein 4
2377332	3.24	CR1	complement component (3b/4b) receptor 1 (Knops blood group)
2632778	3.24	EPHA6	EPH receptor A6
3507282	3.24	FLT1	fms-related tyrosine kinase 1
3318136	3.24	OR52K1	olfactory receptor, family 52, subfamily K, member 1
2636125	3.23	CD200	CD200 molecule
3443985	3.23	CLEC1A	C-type lectin domain family 1, member A
2965206	3.23	EPHA7	EPH receptor A7
2900832	3.23	OR2H1	olfactory receptor, family 2, subfamily H, member 1
3527348	3.23	OR4N5	olfactory receptor, family 4, subfamily N, member 5
2951730	3.23	SLC26A8	solute carrier family 26 (anion exchanger), member 8
3974019	3.23	TSPAN7	tetraspanin 7
3361504	3.22	OR5P3	olfactory receptor, family 5, subfamily P, member 3
3373411	3.22	OR5R1	olfactory receptor, family 5, subfamily R, member 1 (gene/pseudogene)
3090209	3.21	ADAM28	ADAM metallopeptidase domain 28
3027956	3.21	TAS2R4	taste receptor, type 2, member 4
3487299	3.21	TNFSF11	tumor necrosis factor (ligand) superfamily, member 11
3330137	3.2	OR4X1	olfactory receptor, family 4, subfamily X, member 1 (gene/pseudogene)
3330892	3.2	OR8I2	olfactory receptor, family 8, subfamily I, member 2
2444239	3.2	TNFSF18	tumor necrosis factor (ligand) superfamily, member 18
2358092	3.19	CA14	carbonic anhydrase XIV
2638789	3.19	CD86	CD86 molecule
3819130	3.19	CLEC4M	C-type lectin domain family 4, member M
2807949	3.19	GHR	growth hormone receptor
2652801	3.19	NLGN1	neuroligin 1
3026216	3.18	CHRM2	cholinergic receptor, muscarinic 2
2882253	3.18	GLRA1	glycine receptor alpha 1
3143643	3.18	MMP16	matrix metallopeptidase 16 (membrane-inserted)
2585322	3.18	SCN1A	sodium channel, voltage gated, type I alpha subunit
3810749	3.17	MC4R	melanocortin 4 receptor
2390298	3.17	OR2L2	olfactory receptor, family 2, subfamily L, member 2
3849464	3.17	OR7G1	olfactory receptor, family 7, subfamily G, member 1
3768627	3.16	ABCA8	ATP binding cassette subfamily A member 8
2440413	3.16	ITLN1	intelectin 1 (galactofuranose binding)
3443804	3.16	KLRB1	killer cell lectin-like receptor subfamily B, member 1
2660617	3.15	IL5RA	interleukin 5 receptor, alpha
3822949	3.15	OR7C2	olfactory receptor, family 7, subfamily C, member 2
3361225	3.14	OR6A2	olfactory receptor, family 6, subfamily A, member 2
2832355	3.14	PCDHB6	protocadherin beta 6
[truncated: 301 more rows]
